# Supplementary material for: Exceptionally efficient catalytic hydrodechlorination of persistent organic pollutants: application of new sterically shielded palladium carbene complexes
Source: Royal Society of Chemistry journal article supplement (doi:10.1039/c4dt02908a), 2014-01-01

## Supporting Information

# Exceptionally Efficient Catalytic Hydrodechlorination of Persistent Organic Pollutants: Application of New Sterically Shielded Palladium Carbene Complexes

Vagiz Sh. Saberov,<sup>†</sup> Daniel A. Evans,<sup>‡</sup> Nikolai I. Korotkikh,<sup>\*†</sup> Alan H. Cowley,<sup>‡</sup>  
Tatyana M. Pekhtereva,<sup>†</sup> Anatolii F. Popov,<sup>†</sup> and Oles P. Shvaika<sup>†</sup>

<sup>†</sup>The L.M. Litvinenko Institute of Physical Organic & Coal Chemistry, Ukrainian Academy of Sciences, 70, R. Luxemburg, Donetsk, 83114, Ukraine

<sup>‡</sup>Department of Chemistry, The University of Texas at Austin, 1 University Station A5300, Austin, Texas 78712-0165

Fax: (512)471-6822; Tel: (512)471-7484;

E-mail: [nkorotkikh@ua.fm](mailto:nkorotkikh@ua.fm)

### Table of contents:

#### 1. General

#### 2. Syntheses of compounds **6a**, **7a**, **8a**, **9a**, **10b**, **11a,b** and a general procedure for the catalytic reaction.

#### 3. Crystallographic data for **9a**, **10b** and **11a**

Table 1. Crystal data and structure refinement for **9a**

Table 2. Crystal data and structure refinement for **10b**.

Table 3. Crystal data and structure refinement for **11a**

Table 4. Selected bond lengths (Å) and bond angles for complex **10b**

Table 5. Selected bond lengths and bond orders for free carbene **9a** (left) and palladium carbene complex **11a** (right).

#### 4. $^1\text{H}$ and $^{13}\text{C}$ NMR spectra

2,6-Dibenzhydryl-4-ethylaniline (**6a**) ( $\text{CDCl}_3$ ).

$\text{N,N}'$ -Bis(2,6-dibenzhydryl-4-ethylphenyl)-1,4-diazabutadiene (**7a**) ( $\text{CDCl}_3$ )

1,3-Bis(2,6-dibenzhydryl-4-ethylphenyl)imidazolium chloride (**8a**) ( $\text{CDCl}_3$ ).

1,3-Bis(2,6-dibenzhydryl-4-ethylphenyl)imidazol-2-ylidene (a cyclohexane solvate) (**9a**) ( $\text{C}_6\text{D}_6$ ).

[1,3-Bis(2,6-diisopropylphenyl)imidazol-2-ylidene]palladium iodide (**10b**) ( $\text{CDCl}_3$ ).

[1,3-Bis(2,6-dibenzhydryl-4-ethylphenyl)imidazol-2-ylidene]palladium chloride (**11a**) ( $\text{CDCl}_3$ ).

[1,3-Bis(2,6-dibenzhydryl-4-ethylphenyl)imidazol-2-ylidene]palladium iodide (**11b**) ( $\text{CDCl}_3$ ).

## 1. General.

$^1\text{H}$  NMR and  $^{13}\text{C}$  NMR spectra were recorded on a Bruker Avance II 400 spectrometer (400 MHz for  $^1\text{H}$  NMR spectra and 100 MHz for  $^{13}\text{C}$  NMR spectra) in  $\text{DMSO-d}_6$ ,  $\text{C}_6\text{D}_6$ , or  $\text{CDCl}_3$  solution. The  $^1\text{H}$  NMR and  $^{13}\text{C}$  NMR chemical shifts are reported relative to tetramethylsilane (TMS) (solution). The X-ray diffraction data were collected on either a Rigaku AFC12 Saturn 724+ CCD diffractometer equipped with a Rigaku XStream low temperature device that operated at 100 K or on a Rigaku SCX-Mini Diffractometer equipped with a Rigaku XStream low temperature device that operated at 100 K, or on a Nonius-Kappa CCD diffractometer with an Oxford cryostream 600 that operated at 153 K. All instruments used a graphite-monochromated  $\text{Mo K}\alpha$  radiation source ( $\lambda = 0.71075 \text{ \AA}$ ). Corrections were applied for Lorentz and polarization effects. The structures were solved by direct methods and refined by full-matrix least-squares cycles on  $F^2$  using the Siemens SHELXTL PLUS 5.0 (PC) software package <sup>1</sup> and PLATON <sup>2</sup>. All non-hydrogen atoms were refined anisotropically. The hydrogen atoms were placed in fixed, calculated positions using a riding model.

Thin-layer chromatography was performed on silica gel with either pure chloroform or a 10:1 mixture of chloroform and methanol as the eluent, followed by development with iodine. Elemental analyses were carried out at the Analytical Laboratory of the Litvinenko Institute of Physical Organic and Coal Chemistry.

## 2. Syntheses of compounds 6a, 7a, 8a, 9a, 10b, 11a,b.

**2,6-Dibenzhydryl-4-ethylaniline (6a)** was prepared in a similar fashion to the literature procedure. <sup>3</sup> A solution of zinc chloride (2.71 g, 20.4 mmol) in hydrochloric acid (36% HCl, 3.40 mL, 40.7 mmol) was added dropwise to a mixture of 4-ethylaniline (4.92 g, 40.7 mmol) and benzhydrol (15.00 g, 81.4 mmol) at 160 °C. The mixture was refluxed for 3 h until it solidified. Once cooled, the product was dissolved in dichloromethane (100 mL) and washed with saturated aqueous solution of ammonium chloride and water. The organic layer was dried with magnesium sulfate and the dichloromethane solvent was evaporated. The solid that had formed was washed with ethyl acetate (50 mL) until the filtrate became colorless; the solid product was subsequently dried. Yield 13.50 g (73%). mp 182 °C (acetonitrile). Found: C, 90.1; H, 6.8; N, 3.1. Calc. for  $\text{C}_{34}\text{H}_{31}\text{N}$ : C, 90.0; H, 6.9; N, 3.1%.  $^1\text{H}$

NMR (400 MHz, CDCl<sub>3</sub>, Me<sub>4</sub>Si): 0.92 (t, 3H, *J* 7.6 Hz, CH<sub>3</sub>C), 2.29 (qr, 2H, *J* 7.6 Hz, CH<sub>2</sub>C), 3.27 (s, 2H, NH<sub>2</sub>), 5.45 (s, 2H, CHPh), 6.42 (s, 2H, C<sup>3,5</sup>H), 7.08 (m, 8H, *J* 6.8 Hz) (Ar), 7.18 (d, 4H), 7.24 (m, 8H). <sup>13</sup>C NMR (100 MHz, CDCl<sub>3</sub>, Me<sub>4</sub>Si): 15.8 (CH<sub>3</sub>C), 28.1 (CH<sub>2</sub>C), 52.4 (CHPh), 126.5 (C<sup>3,5</sup>, Ar), 127.8 (C<sup>4</sup>, Ph), 128.4 (C<sup>3,5</sup>, Ph), 129.1 (*ipso*-C<sup>2,6</sup>), 129.4 (C<sup>4</sup>, Ar), 133.1 (C<sup>1</sup>, Ar), 139.8 (C<sup>2,6</sup>, Ar), 142.7 (*ipso*-CPh).

**N,N'-Bis(2,6-dibenzhydryl-4-ethylphenyl)-1,4-diazabutadiene (7a)** was prepared in a similar fashion to the literature procedure.<sup>3</sup> Two drops of formic acid (0.06 mL) and a solution of 40% aqueous glyoxal (1.2 mL, 10 mmol) was added dropwise to a suspension of 2,6-dibenzhydryl-4-ethylaniline (9.06 g, 20 mmol) in *n*-propanol (60 mL) and refluxed for 3 h. Once cooled, the precipitate that had formed was filtered off, washed with *n*-propanol (25 mL) and subsequently dried. Yield 7.65 g (82%), mp > 300 °C (chloroform). Found: C, 90.4; H, 6.5; N, 3.1. Calc. for C<sub>70</sub>H<sub>60</sub>N<sub>2</sub>: C, 90.5; H, 6.5; N, 3.0%. <sup>1</sup>H NMR (400 MHz, CDCl<sub>3</sub>, Me<sub>4</sub>Si): 1.05 (t, 6H, *J* 7.2 Hz, CH<sub>3</sub>C), 2.45 (qr, 2H) (*J* 7.2 Hz, CH<sub>2</sub>C), 5.29 (s, 4H, CHPh), 6.73 (s, 4H, C<sup>3,5</sup>H), 7.03 (m, 16H, Ar), 7.24 (m, 26H, Ar+CHN). <sup>13</sup>C NMR (100 MHz, CDCl<sub>3</sub>, δ, ppm): 15.6 (CH<sub>3</sub>C), 28.5 (CH<sub>2</sub>C), 51.2 (CHPh), 126.4 (C<sup>4</sup>, Ph), 128.0 (C<sup>3,5</sup>, Ar), 128.3 (C<sup>3,5</sup>, Ph), 129.6 (C<sup>2,6</sup>, Ph), 132.0 (C<sup>2,6</sup>, Ar), 140.0 (C<sup>1</sup>, Ar), 143.9 (*ipso*-C-Ph), 146.9 (C<sup>4</sup>, Ar), 163.9 (CHN).

**1,3-Bis(2,6-dibenzhydryl-4-ethylphenyl)imidazolium chloride (8a)** was prepared in a similar fashion to the literature procedure.<sup>3</sup> A solution of paraformaldehyde (0.32 g, 10.66 mmol, 1.3 eq), zinc chloride (1.45 g, 10.66 mmol, 1.3 eq.), and 36% hydrochloric acid (1.5 mL, 10.66 mmol, 1.3 eq.) was added to a solution of the diimine **7a** (7.64 g, 8.2 mmol) in chloroform solution (60 mL) and stirred for 4 h. Hydrochloric acid (2M HCl, 50 mL) was added to the reaction mixture. The organic layer was washed with water, dried with magnesium sulfate, and solvent was subsequently evaporated. The solid product was refluxed with diethyl ether (50 mL), filtered off, and dried. Yield 6.00 g (75 %). mp > 300°C (benzene). Found: C, 87.1; H, 6.3; Cl, 3.7; N, 2.9. Calc. for C<sub>71</sub>H<sub>61</sub>ClN<sub>2</sub>: C, 87.2; H, 6.3; Cl, 3.6; N, 2.9 %. <sup>1</sup>H NMR (400 MHz, CDCl<sub>3</sub>, Me<sub>4</sub>Si): 0.99 (t, 6H, *J* 7.6 Hz, CH<sub>3</sub>C), 2.45 (qr, 4H, *J* 7.6 Hz, CH<sub>2</sub>C), 5.29 (s, 4H, CHPh), 5.52 (s, 2H, C<sup>4,5</sup>H-im), 6.78 (m, 12H, C<sup>3,5</sup>H), 7.12 (m, 16H), 7.23 (m, 16H) (Ar), 12.83 (s, 1H, CHN). <sup>13</sup>C NMR (100 MHz, CDCl<sub>3</sub>, Me<sub>4</sub>Si): 14.9 (CH<sub>3</sub>C), 28.8 (CH<sub>2</sub>C), 51.5 (CHPh), 123.5 (C<sup>4,5</sup>Im), 126.9, 127.1, 128.71, 128.74, 127.9, 129.3, 129.7, 130.2 (CH, Ar), 142.7 (C<sup>2</sup>HN), 130.3, 140.8, 142.1, 142.6 (*ipso*-C, Ar, Ph), 147.5 (*ipso*-C<sup>2,6</sup>, Ar).

**1,3-Bis(2,6-dibenzhydryl-4-ethylphenyl)imidazol-2-ylidene (a cyclohexane solvate) (9a)**. A suspension of sodium hydride in paraffin oil (37% NaH, 0.04 g, 0.6 mmol, 1.5 eq.) was added to a solution of the salt **8a** (0.39 g, 0.4 mmol) in anhydrous THF (7 mL) and stirred for 24 h. The solution was subsequently filtered and the solvent was evaporated resulting in the formation of the solid product. Yield 0.30 g (79%). mp 182–183°C (cyclohexane). Found: C, 90.3; H, 7.1; N, 2.6 %. Calc. for C<sub>77</sub>H<sub>72</sub>N<sub>2</sub>: C, 90.2; H, 7.1; N, 2.7 %. <sup>1</sup>H NMR (400 MHz, C<sub>6</sub>D<sub>6</sub>, Me<sub>4</sub>Si): 0.87 (m, 6H, CH<sub>3</sub>C), 1.42

(s, 12H, CyH), 2.22 (m, 4H, CH<sub>2</sub>C), 5.81 (s, 2H, C<sup>4,5</sup>HN), 6.04 (s, 4H, CHPh), 6.99–7.17 (m, 36H), 7.38 (m, 8H) (Ar). <sup>13</sup>C NMR (100 MHz, CDCl<sub>3</sub>, Me<sub>4</sub>Si): 15.4 (CH<sub>3</sub>C), 27.2 (CyH, CH<sub>2</sub>C), 28.9 (CH<sub>2</sub>C), 51.5 (CHPh), 122.5 (C<sup>4,5</sup>, Im), 126.5 (C<sup>3,5</sup>, Ar), 128.5, 128.6 (C<sup>3,5</sup>, Ph), 128.8 (C<sup>4</sup>, Ph), 129.9, 130.2 (C<sup>2,6</sup>, Ph), 138.3 (*ipso*-C<sup>1</sup>, Ar), 141.9, 143.9 (C<sup>1</sup>, Ph), 144.5 (*ipso*-C<sup>4</sup>, Ar), 145.0 (*ipso*-C<sup>2,6</sup>, Ar), 218.6 (C<sup>2</sup>N).

**[1,3-Bis(2,6-diisopropylphenyl)imidazol-2-ylidene]palladium iodide (10b)**. A solution of 1,3-(2,6-diisopropylphenyl)imidazolium perchlorate (0.98 g, 2.0 mmol), prepared according to the literature procedure,<sup>4</sup> and potassium *tert*-butoxide (0.24 g, 2.1 mmol) in anhydrous THF (15 mL) was stirred for 2 h. Palladium iodide 0.72 g (2 mmol) was added to the reaction mixture which was stirred at room temperature for 6 h. The solvent was then evaporated resulting in the formation of the product which was then subsequently stirred in petroleum ether. The precipitate that was formed was dissolved in a mixture of cyclohexane and diethyl ether (1:1) and filtered through a thin layer of silica gel (70/230 μm). The solvent was then evaporated and the residue was stirred with petroleum ether. The resulting precipitate that had formed was filtered off and dried. Yield 1.3 g (87 %), mp 288 – 289 °C (cyclohexane). Found: C, 43.2; H, 4.8; I, 34.0; N, 3.7%. Calc. for C<sub>54</sub>H<sub>72</sub>I<sub>4</sub>N<sub>4</sub>Pd<sub>2</sub>: C, 43.3; H, 4.9; I, 33.9; N, 3.7%. <sup>1</sup>H NMR (400 MHz, DMSO-d<sub>6</sub>, Me<sub>4</sub>Si): 0.93 (d, 12H, *J* 6.8 Hz), 1.07 (d, 12H, *J* 6.8 Hz), 1.24 (d, 12H, *J* 6.8 Hz), 1.46 (d, 12H, *J* 6.8 Hz) (CH<sub>3</sub>C, *i*-Pr), 2.75 (*t*, 4H, *J* 6.8 Hz), 3.29 (*t*, 4H, *J* 6.8 Hz) (CHC, *i*-Pr), 7.09 (s, 2H, C<sup>4,5</sup>N), 7.25 (d, 4H, *J* 7.6 Hz), 7.33 (d, 4H, *J* 7.6 Hz), 7.51 (dd, 4H, *J* 7.6 Hz) (Ar). <sup>13</sup>C NMR (100 MHz, DMSO-d<sub>6</sub>, Me<sub>4</sub>Si): 23.9, 24.0 (CHC, *i*-Pr), 26.5, 29.0 (CH<sub>3</sub>C, *i*-Pr), 124.2, 124.7 (C<sup>4,5</sup>, Im), 125.4, 130.3 (Ar), 135.3 (*ipso*-C<sup>1</sup>, Ar), 145.9, 146.3 (*ipso*-C<sup>2,6</sup>, Ar), 165.4 (C<sup>2</sup>-Pd).

**[1,3-Bis(2,6-dibenzhydryl-4-ethylphenyl)imidazol-2-ylidene]palladium chloride (11a)**. A suspension of sodium hydride (37% NaH, 0.05 g, 0.75 mmol, 1.5 eq.) in paraffin oil was added to a solution of the salt **8b** (0.49 g, 0.5 mmol) in anhydrous THF solution (8 mL) and stirred for 24 h. Next, Pd(PhCN)<sub>2</sub>Cl<sub>2</sub> (0.19 g, 0.5 mmol) was added and after 5 h of stirring, the solution was filtered and the solvent was evaporated to dryness resulting in formation of the solid product. Yield 0.43 g (77%), mp 251–252°C (acetonitrile). Found: C, 76.3; H, 5.2; Cl, 6.4; N, 2.6. Calc. for C<sub>71</sub>H<sub>60</sub>Cl<sub>2</sub>N<sub>2</sub>Pd: C, 76.2; H, 5.4; Cl, 6.3; N, 2.5%. <sup>1</sup>H NMR (400 MHz, CDCl<sub>3</sub>, Me<sub>4</sub>Si): 0.66 (*t*, 3H, *J* 7.6 Hz, CH<sub>3</sub>C), 0.97 (*tt*, 3H, *J* 7.2 Hz, CH<sub>3</sub>C), 2.01 (*qr*, 2H, *J* 7.6 Hz, CH<sub>2</sub>C), 2.32 (*qrqr*, 2H, *J* 7.2 Hz, CH<sub>2</sub>C), 4.14 (s, 1H, CHPh), 4.32 (s, 1H, CHPh), 5.42 (s, 1H, CHPh), 6.11 (s, 2H, C<sup>4,5</sup>HN), 6.32 (s, 1H, CHPh), 6.49 (s, 2H, Ar), 6.76 (m, 7H, Ar), 6.92 (m, 4H, Ar), 7.01–7.06 (m, 7H, Ar), 7.16–7.29 (m, 20H, Ar), 7.58 (m, 4H, Ar). <sup>13</sup>C NMR (100 MHz, CDCl<sub>3</sub>, Me<sub>4</sub>Si): 14.0, 15.0, 15.6 (CH<sub>3</sub>C), 28.1, 28.5 (CH<sub>2</sub>C), 51.3, 51.7 (CHPh), 126.0, 126.1 (C<sup>4,5</sup>, Im), 123.2, 125.8, 127.1, 127.4, 127.6, 127.9, 128.1, 128.4, 128.6,

128.9, 129.5, 129.8, 130.1, 131.2 (CH, Ar), 133.7, 133.8, 134.8, 136.1, 138.6, 140.8, 141.1, 141.5, 142.7 (*ipso*-C, Ar), 143.2, 144.7 (*ipso*-C4, Ar), 143.4, 145.7 (*ipso*-C, Ph), 156.4 (C<sup>2</sup>-Pd).

**[1,3-Bis(2,6-dibenzhydryl-4-ethylphenyl)imidazol-2-ylidene]palladium iodide (11b)**. A solution of potassium bis(trimethylsilyl)amide in toluene (0.55 mmol) was added to a solution of the salt **8b** (0.49 g, 0.5 mmol) in anhydrous THF solution (8 mL) and stirred for 2 h. Next, palladium iodide (0.18 g, 0.5 mmol) was added and the resulting solution was stirred for 22 h, following which the solution was filtered and the solvent was evaporated. The residue was dissolved in dichloromethane solution and filtered through a thin layer of silica gel. The dichloromethane solution was then evaporated to dryness. Yield 0.50 g (77%), mp > 300 °C (acetonitrile). Found: C, 65.6; H, 4.7; I, 19.4; N, 2.2%. Calc. for C<sub>71</sub>H<sub>60</sub>I<sub>2</sub>N<sub>2</sub>Pd: C, 65.5; H, 4.7; I, 19.5; N, 2.2%. <sup>1</sup>H NMR (400 MHz, CDCl<sub>3</sub>, Me<sub>4</sub>Si): 0.96 (s, broad., 6H, CH<sub>3</sub>C), 2.44 (s, broad., 4H, CH<sub>2</sub>C), 5.06 (s, broad., 4H, CHPh), 5.75, 5.93 (s, broad., 2H, C<sup>4,5</sup>HN), 6.78, 7.17 (m, 44H, Ar); <sup>13</sup>C NMR (100 MHz, CDCl<sub>3</sub>, Me<sub>4</sub>Si): 16.1 (CH<sub>3</sub>C), 29.8 (CH<sub>2</sub>C), 52.6 (CHPh), 128.3, 128.6 (C<sup>4,5</sup>, Im), 125.4, 129.3, 130.0, 130.9, 132.0 (CH, Ar), 138.2, 141.4, 142.2, 143.1 (*ipso*-C, Ar), 149.1 (C<sup>2</sup>Pd).

**General procedure for the catalytic reaction.** A specified amount of catalyst (see Tables 2 and 3) was added to either a solution of *p*-dichlorobenzene (2 mmol) in isopropanol (10 mL) or to a dispersion of hexachlorobenzene (2 mmol) in isopropanol (10 mL). Following this addition, the appropriate solution or mixture was heated to 60 °C. At this temperature, a base (potassium *tert*-butoxide, sodium *tert*-butoxide, or sodium hydroxide) (5.2 mmol for *p*-dichlorobenzene or 16 mmol for hexachlorobenzene) was added to the reaction mixture under an argon atmosphere and subsequently refluxed for 8 or 24 h. The precipitate that had formed was filtered off, washed with isopropanol and petroleum ether, and subsequently dried. The percent conversion was estimated according to the masses of the potassium or sodium chloride precipitate that had formed during the hydrodechlorination reaction. The TON (turnover number, number of cycles of the catalytic reaction) was calculated as a ratio of moles of substrate (per 1 chlorine atom) to the number of moles of catalyst. The TOF (turnover frequency, productivity of the reaction in h<sup>-1</sup>) was calculated as a ratio of the TON to the reaction time in hours.

## REFERENCES

1. (a) Sheldrick G. M., SHELXTL-PC, version 5.03, Siemens Analytical X-ray Instruments, Inc., Madison, 1994, WI. See also, (b) G. M. Sheldrick, *Acta Cryst.* 2008, A 64, 112.
2. Spek A. L. PLATON, A Multipurpose Crystallographic Tool, Utrecht University, The Netherlands, 1998.

3. Berthon-Gelloz, G.; Siegler, M. A.; Spek, A. L.; Tinant, B.; Reek, J. N. H.; Marko, I. E. *Dalton Trans.*, **2010**, 39, 1444–1446.
4. (a) Arduengo, A. J.; Krafczyk, R.; Schmutzler, R. *Tetrahedron*, **1999**, 55, 14523–14534; (b) Huang, J.; Nolan, S. P. *J. Am. Chem. Soc.* **1999**, 121, 9889–9890.

### 3. Crystallographic data for 9a, 10b and 11a

**Table 1.** Crystal data and structure refinement for **9a**.

|                                 |                                                |                             |
|---------------------------------|------------------------------------------------|-----------------------------|
| Identification code             | shelxl                                         |                             |
| Empirical formula               | C <sub>83</sub> H <sub>72</sub> N <sub>2</sub> |                             |
| Formula weight                  | 1097.43                                        |                             |
| Temperature                     | 133(2) K                                       |                             |
| Wavelength                      | 0.71073 E                                      |                             |
| Crystal system                  | Monoclinic                                     |                             |
| Space group                     | P21/c                                          |                             |
| Unit cell dimensions            | a = 20.0820(11) E                              | $\alpha = 90^\circ$ .       |
|                                 | b = 12.4790(7) E                               | $\beta = 95.975(3)^\circ$ . |
|                                 | c = 25.4950(12) E                              | $\gamma = 90^\circ$ .       |
| Volume                          | 6354.4(6) E <sup>3</sup>                       |                             |
| Z                               | 4                                              |                             |
| Density (calculated)            | 1.147 Mg/m <sup>3</sup>                        |                             |
| Absorption coefficient          | 0.065 mm <sup>-1</sup>                         |                             |
| F(000)                          | 2336                                           |                             |
| Crystal size                    | 0.37 x 0.24 x 0.22 mm <sup>3</sup>             |                             |
| Theta range for data collection | 1.02 to 25.00°.                                |                             |
| Index ranges                    | -23 ≤ h ≤ 23, -14 ≤ k ≤ 14, -30 ≤ l ≤ 30       |                             |
| Reflections collected           | 128546                                         |                             |
| Independent reflections         | 11173 [R(int) = 0.0735]                        |                             |
| Completeness to theta = 25.00°  | 99.9 %                                         |                             |
| Absorption correction           | Semi-empirical from equivalents                |                             |
| Max. and min. transmission      | 1.0 and 0.852                                  |                             |



|                                      |                                    |
|--------------------------------------|------------------------------------|
| Refinement method                    | Full-matrix least-squares on $F^2$ |
| Data / restraints / parameters       | 11173 / 732 / 832                  |
| Goodness-of-fit on $F^2$             | 1.039                              |
| Final R indices [ $I > 2\sigma(I)$ ] | R1 = 0.0668, wR2 = 0.1550          |
| R indices (all data)                 | R1 = 0.1128, wR2 = 0.2097          |
| Largest diff. peak and hole          | 0.633 and -0.324 e.E <sup>-3</sup> |

**Table 2.** Crystal data and structure refinement for **10b**.

|                                 |                                                                               |                              |
|---------------------------------|-------------------------------------------------------------------------------|------------------------------|
| Identification code             | shelxl                                                                        |                              |
| Empirical formula               | C <sub>54</sub> H <sub>72</sub> I <sub>4</sub> N <sub>4</sub> Pd <sub>2</sub> |                              |
| Formula weight                  | 1497.56                                                                       |                              |
| Temperature                     | 100(2) K                                                                      |                              |
| Wavelength                      | 0.71073 E                                                                     |                              |
| Crystal system                  | Triclinic                                                                     |                              |
| Space group                     | P-1                                                                           |                              |
| Unit cell dimensions            | a = 16.2590(3) E                                                              | $\alpha = 81.490(4)^\circ$ . |
|                                 | b = 17.1190(4) E                                                              | $\beta = 75.160(4)^\circ$ .  |
|                                 | c = 21.2460(3) E                                                              | $\gamma = 89.228(4)^\circ$ . |
| Volume                          | 5651.54(19) E <sup>3</sup>                                                    |                              |
| Z                               | 4                                                                             |                              |
| Density (calculated)            | 1.760 Mg/m <sup>3</sup>                                                       |                              |
| Absorption coefficient          | 2.858 mm <sup>-1</sup>                                                        |                              |
| F(000)                          | 2912                                                                          |                              |
| Crystal size                    | 0.21 x 0.18 x 0.04 mm <sup>3</sup>                                            |                              |
| Theta range for data collection | 1.68 to 27.50°.                                                               |                              |

|                                   |                                             |
|-----------------------------------|---------------------------------------------|
| Index ranges                      | -20<=h<=21, -22<=k<=22, -27<=l<=27          |
| Reflections collected             | 60969                                       |
| Independent reflections           | 25848 [R(int) = 0.0408]                     |
| Completeness to theta = 27.50°    | 99.6 %                                      |
| Absorption correction             | Semi-empirical from equivalents             |
| Max. and min. transmission        | 1.0000 and 0.7247                           |
| Refinement method                 | Full-matrix least-squares on F <sup>2</sup> |
| Data / restraints / parameters    | 25848 / 0 / 1185                            |
| Goodness-of-fit on F <sup>2</sup> | 1.090                                       |
| Final R indices [I>2sigma(I)]     | R1 = 0.0400, wR2 = 0.0919                   |
| R indices (all data)              | R1 = 0.0517, wR2 = 0.1023                   |
| Largest diff. peak and hole       | 1.264 and -1.920 e.E <sup>-3</sup>          |

**Table 3.** Crystal data and structure refinement for **11a**

|                      |                        |                               |
|----------------------|------------------------|-------------------------------|
| Identification code  | shelxl                 |                               |
| Empirical formula    | C81 H71 Cl2 N7 Pd      |                               |
| Formula weight       | 1319.75                |                               |
| Temperature          | 100(2) K               |                               |
| Wavelength           | 0.71073 E              |                               |
| Crystal system       | Monoclinic             |                               |
| Space group          | I2/a                   |                               |
| Unit cell dimensions | a = 20.878(4) E        | $\alpha = 90^\circ$ .         |
|                      | b = 13.816(3) E        | $\beta = 100.548(13)^\circ$ . |
|                      | c = 24.980(4) E        | $\gamma = 90^\circ$ .         |
| Volume               | 7084(2) E <sup>3</sup> |                               |

|                                   |                                             |
|-----------------------------------|---------------------------------------------|
| Z                                 | 4                                           |
| Density (calculated)              | 1.238 Mg/m <sup>3</sup>                     |
| Absorption coefficient            | 0.386 mm <sup>-1</sup>                      |
| F(000)                            | 2744                                        |
| Crystal size                      | 0.23 x 0.18 x 0.17 mm <sup>3</sup>          |
| Theta range for data collection   | 1.66 to 27.50°.                             |
| Index ranges                      | -27<=h<=27, -17<=k<=17, -32<=l<=32          |
| Reflections collected             | 63422                                       |
| Independent reflections           | 8121 [R(int) = 0.0543]                      |
| Completeness to theta = 27.50°    | 99.9 %                                      |
| Absorption correction             | Semi-empirical from equivalents             |
| Max. and min. transmission        | 1.0000 and 0.9273                           |
| Refinement method                 | Full-matrix least-squares on F <sup>2</sup> |
| Data / restraints / parameters    | 8121 / 35 / 442                             |
| Goodness-of-fit on F <sup>2</sup> | 1.085                                       |
| Final R indices [I>2sigma(I)]     | R1 = 0.0583, wR2 = 0.1605                   |
| R indices (all data)              | R1 = 0.0606, wR2 = 0.1630                   |
| Largest diff. peak and hole       | 0.804 and -0.957 e.E <sup>-3</sup>          |

**Table 4.** Selected bond lengths (Å) and bond angles for complex **10b**

| Bond       | Length (Å) | Angles                | °           |
|------------|------------|-----------------------|-------------|
| C(1)-N(1)  | 1.347(6)   | N(1)-C(1)-N(2)        | 104.7(4)    |
| C(1)-N(2)  | 1.352(6)   | C(1)-Pd(1)-I(1)       | 88.87(12)   |
| C(2)-C(3)  | 1.332 (7)  | I(1)-Pd(1)-I(2)       | 172.883(18) |
| C(2)-N(1)  | 1.378 (6)  | N(1)-C(2)-C(3)-N(2)   | 1.4(5)      |
| C(3)-N(2)  | 1.387(6)   | Pd(1)-C(1)-N(1)-C(4)  | 11.2(6)     |
| N(1)-C(4)  | 1.454(6)   | Pd(1)-C(1)-N(2)-C(16) | -16.8(7)    |
| N(2)-C(16) | 1.449(6)   | N(1)-C(1)-Pd(1)-I(1)  | 92.9(4)     |
| C(1)-Pd(1) | 1.985(4)   | N(2)-C(1)-Pd(1)-I(1)  | -78.6(4)    |

**Table 5.** Selected bond lengths and bond orders for free carbene **9a** (left) and palladium carbene complex **11a** (right).

| Bond <b>9a</b> | Length (Å)<br><b>9a</b> | Bond order<br><b>9a</b> | Bond <b>11a</b> | Length, Å<br><b>11a</b> | Bond order<br><b>11a</b> |
|----------------|-------------------------|-------------------------|-----------------|-------------------------|--------------------------|
| C(1)-N(1)      | 1.364(4)                | 1.632                   | C(1)-N(1)       | 1.359(3)                | 1.661                    |
| C(2)-C(3)      | 1.327(5)                | 2.051                   | C(2)-C(2a)      | 1.340(5)                | 1.985                    |
| C(2)-N(1)      | 1.387(4)                | 1.500                   | C(2)-N(1)       | 1.394 (3)               | 1.460                    |
| C(3)-N(2)      | 1.381(4)                | 1.534                   | -               | -                       | -                        |
| C(1)-N(2)      | 1.368(4)                | 1.609                   | C(1)-N(1a)      | 1.359(3)                | 1.661                    |
| N(1)-C(9)      | 1.434(4)                | 1.230                   | N(1)-C(3)       | 1.449(3)                | 1.144                    |
| N(2)-C(38)     | 1.431(4)                | 1.247                   | -               | -                       | -                        |
| -              | -                       | -                       | C(1)-Pd(1)      | 1.961(4)                | -                        |
| -              | -                       | -                       | Pd(1)-Cl(1)     | 2.3002(9)               | -                        |

## 4. $^1\text{H}$ and $^{13}\text{C}$ NMR spectra

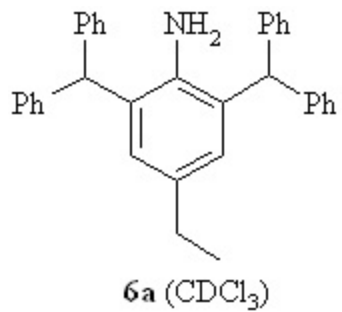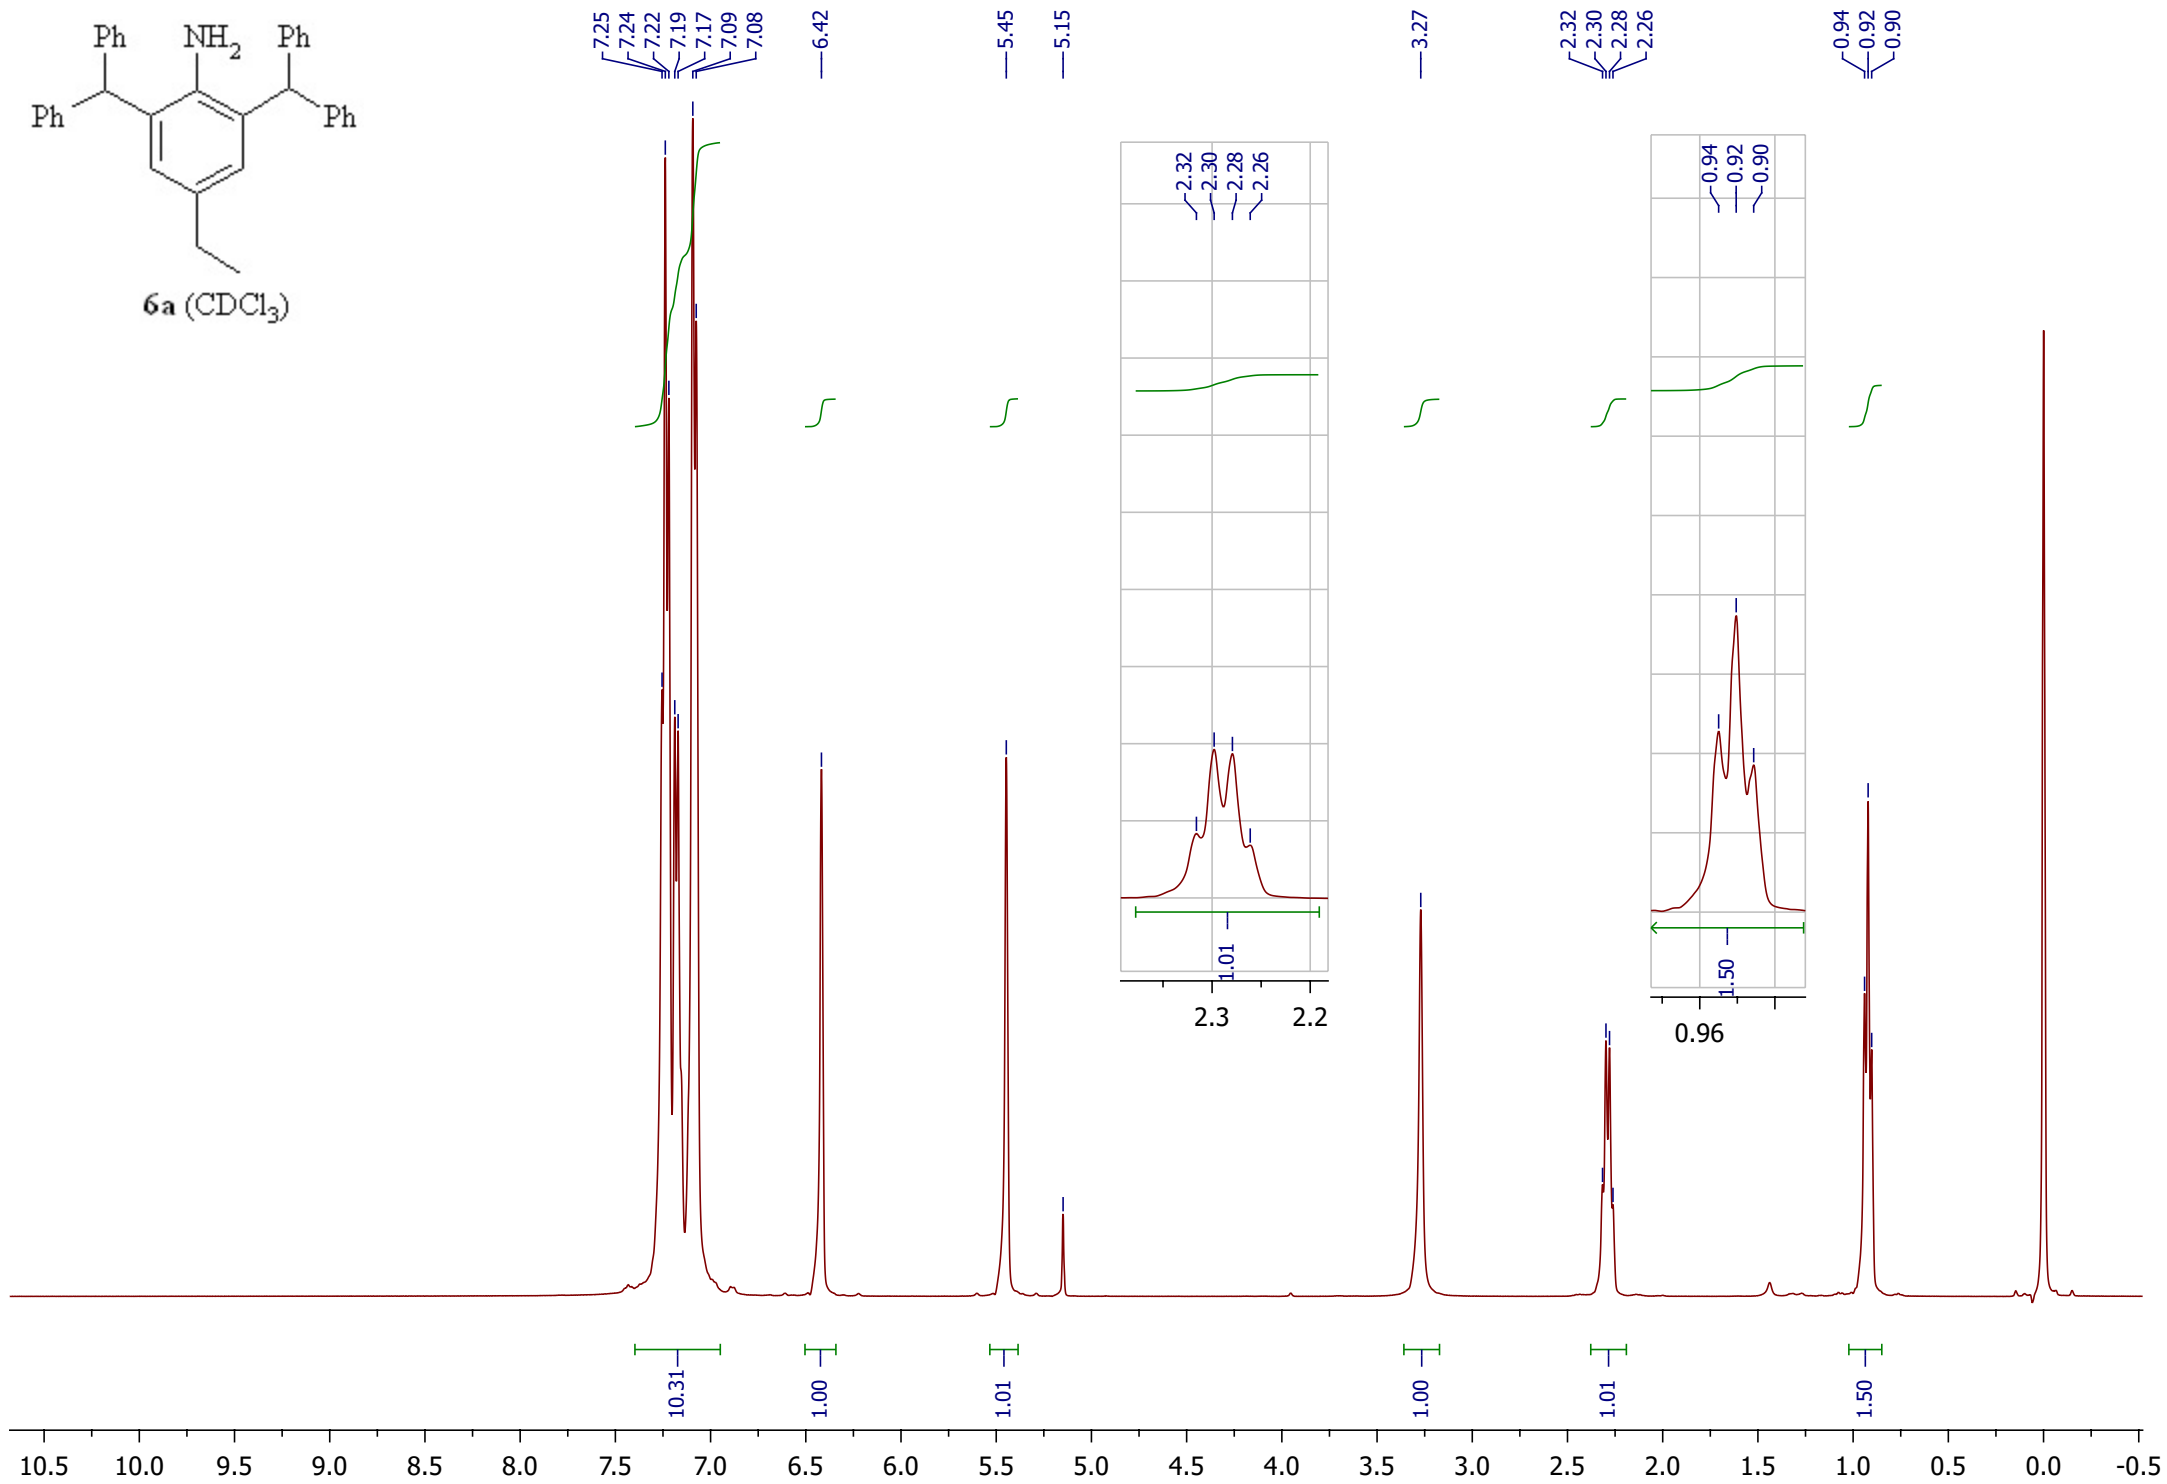

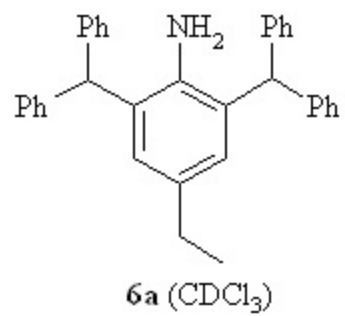

142.73  
139.79  
133.13  
129.48  
129.08  
128.39  
127.78  
126.51

77.22  
76.61

52.40

28.14

15.75

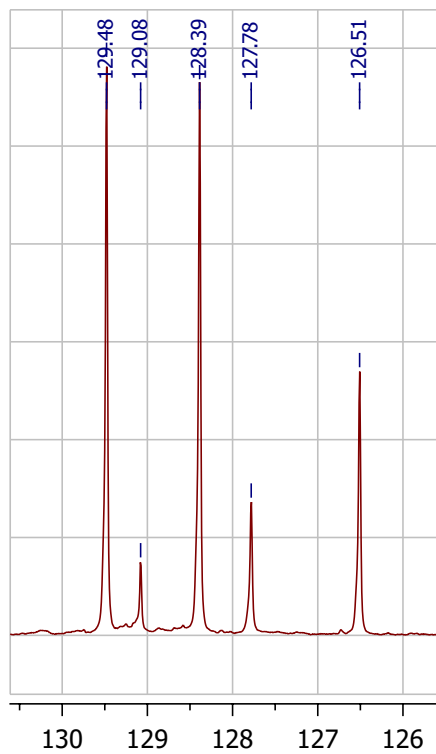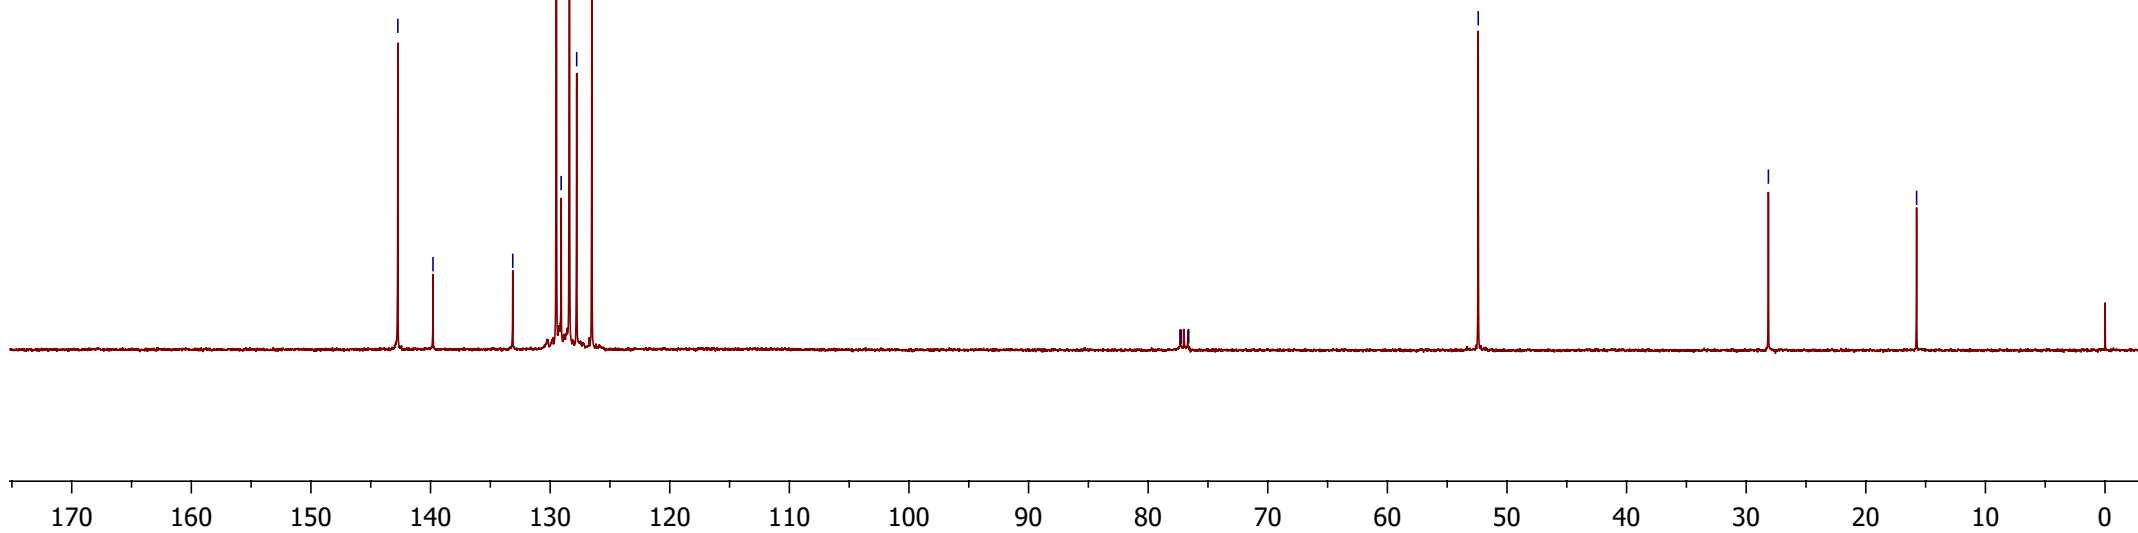

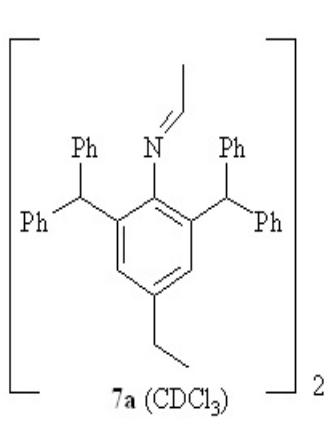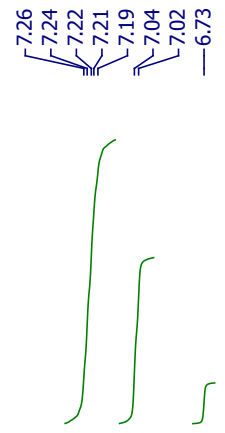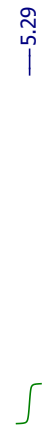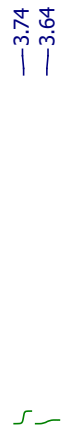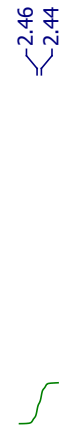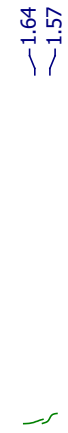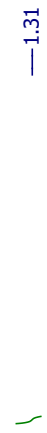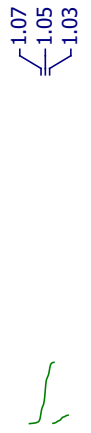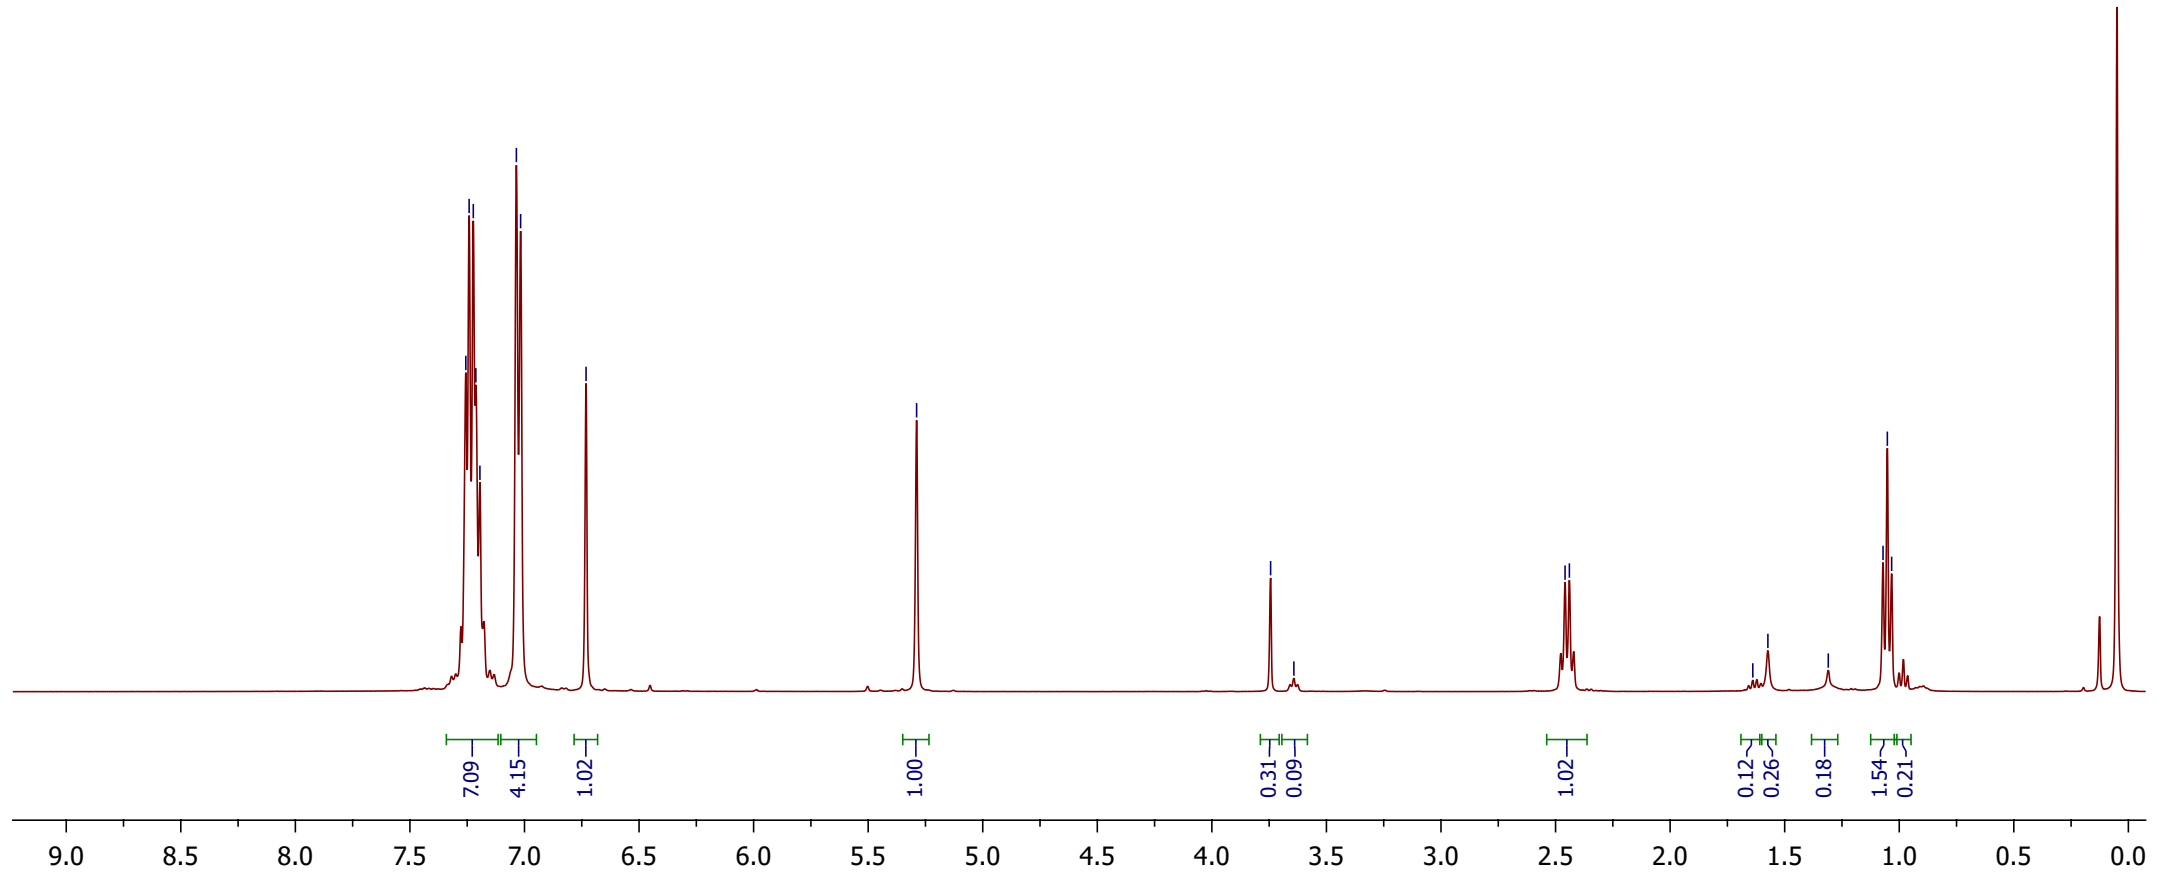



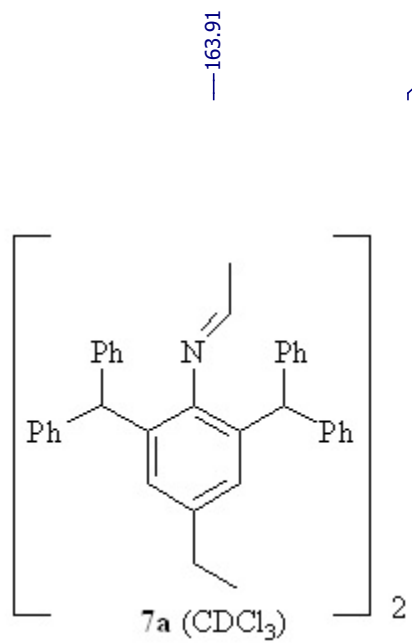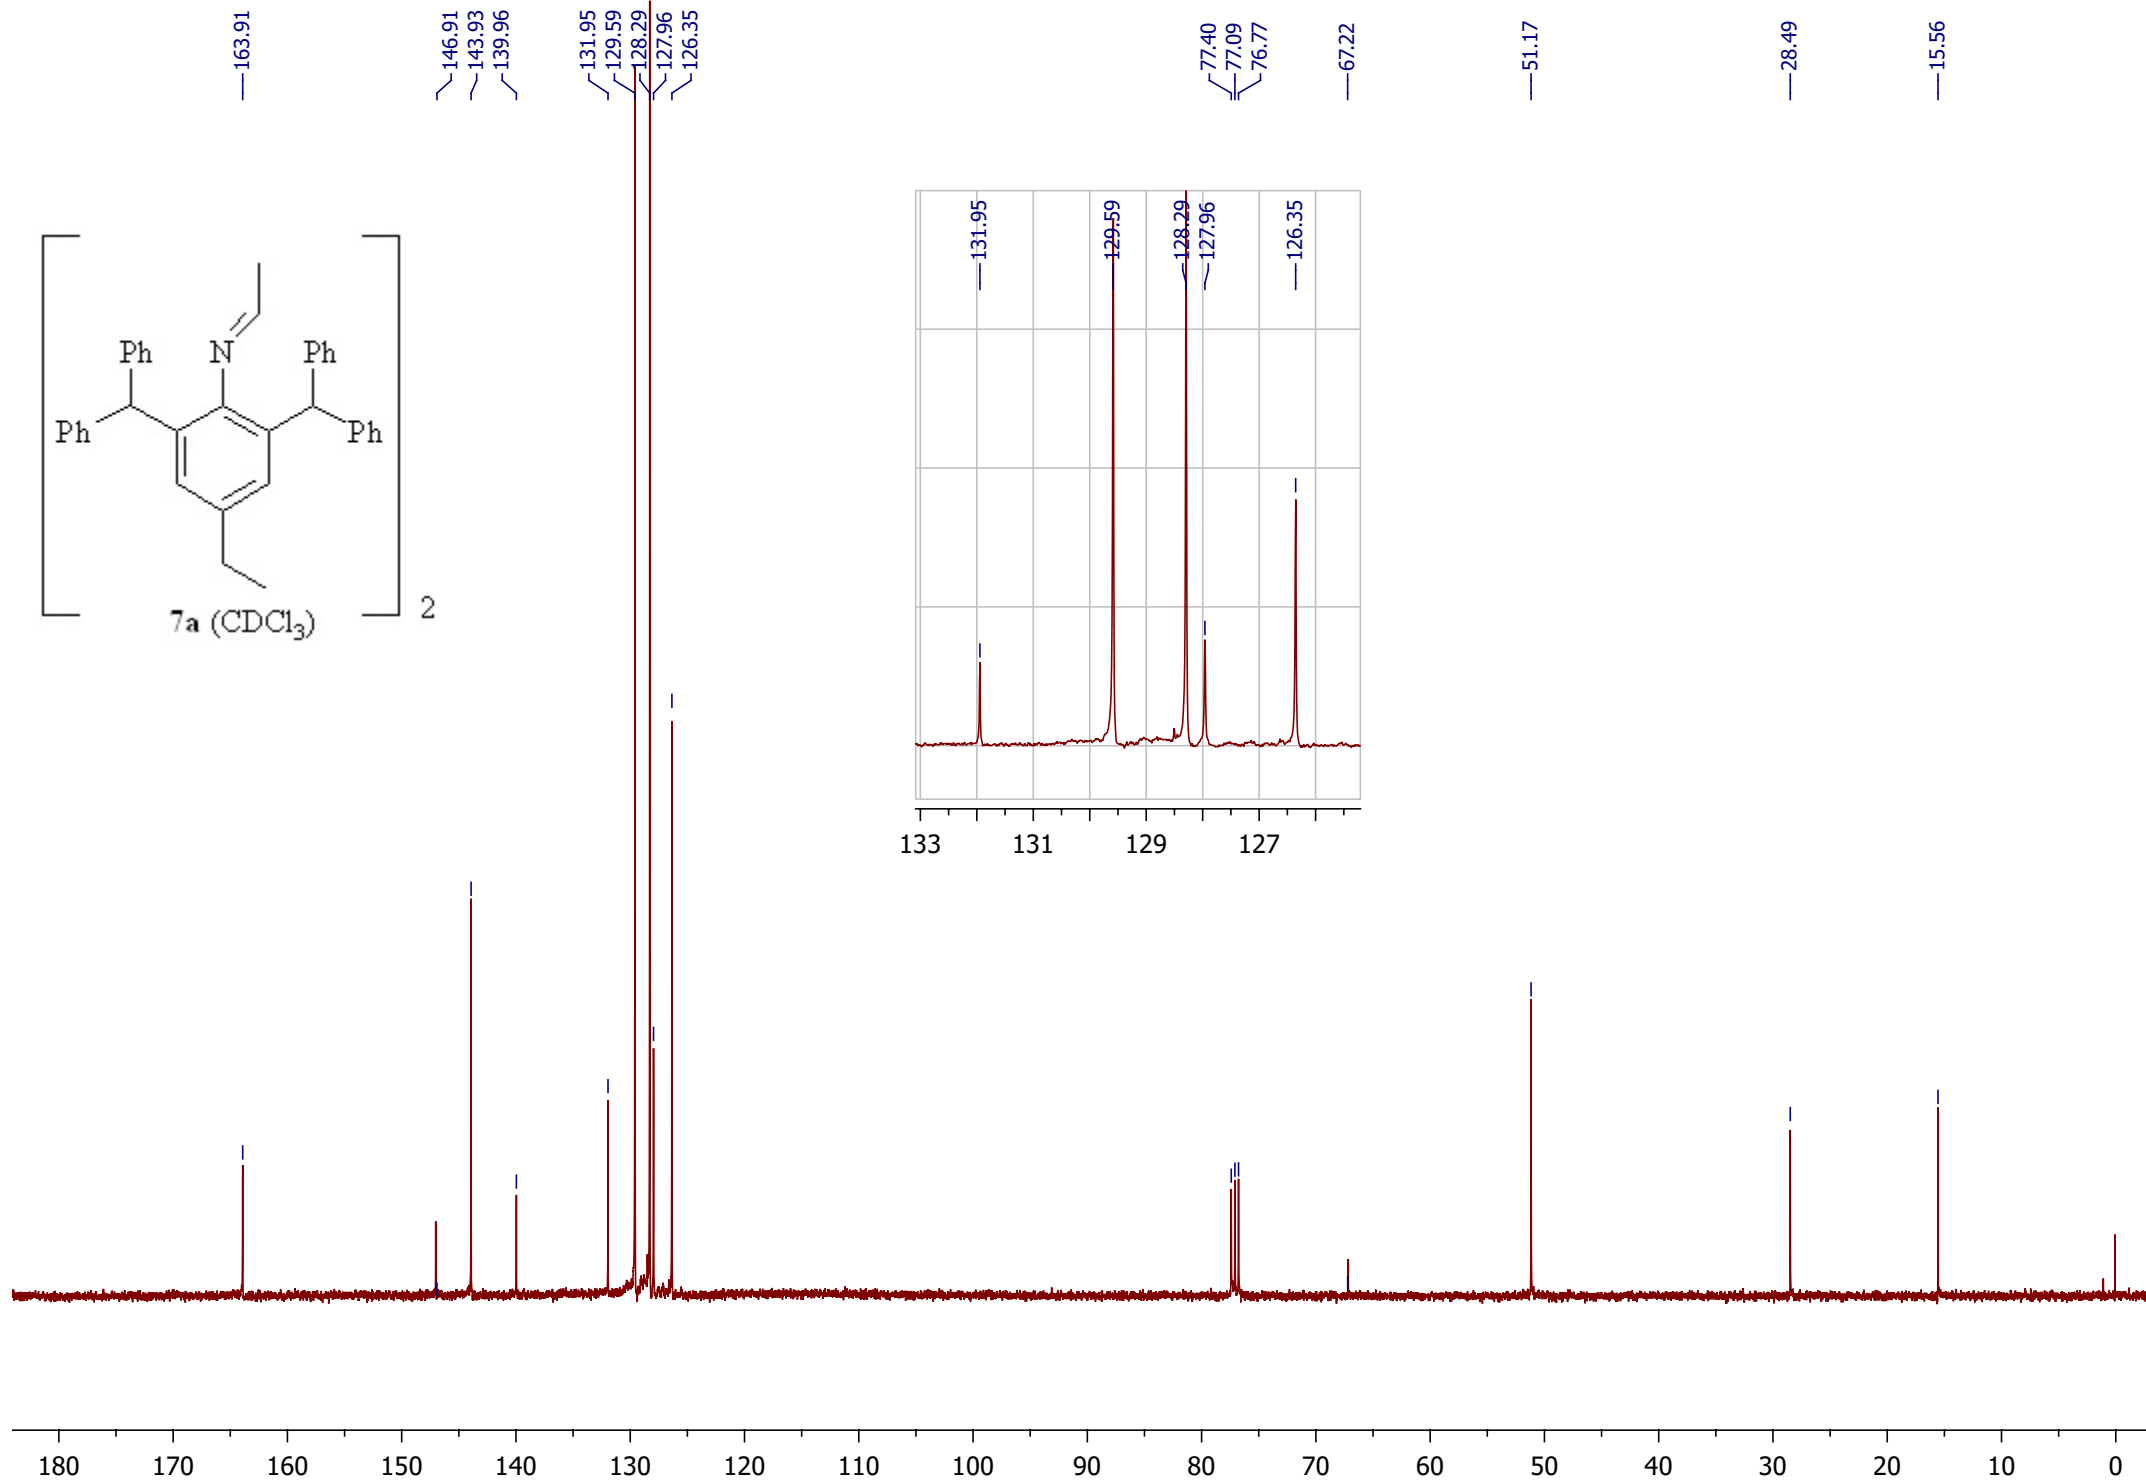

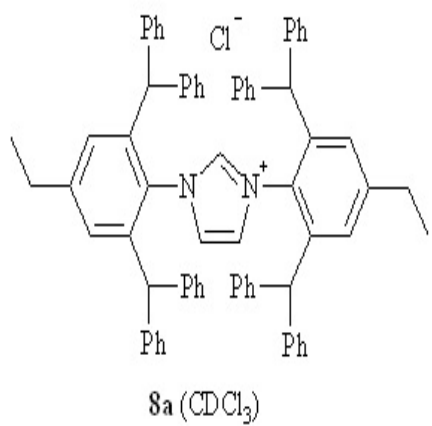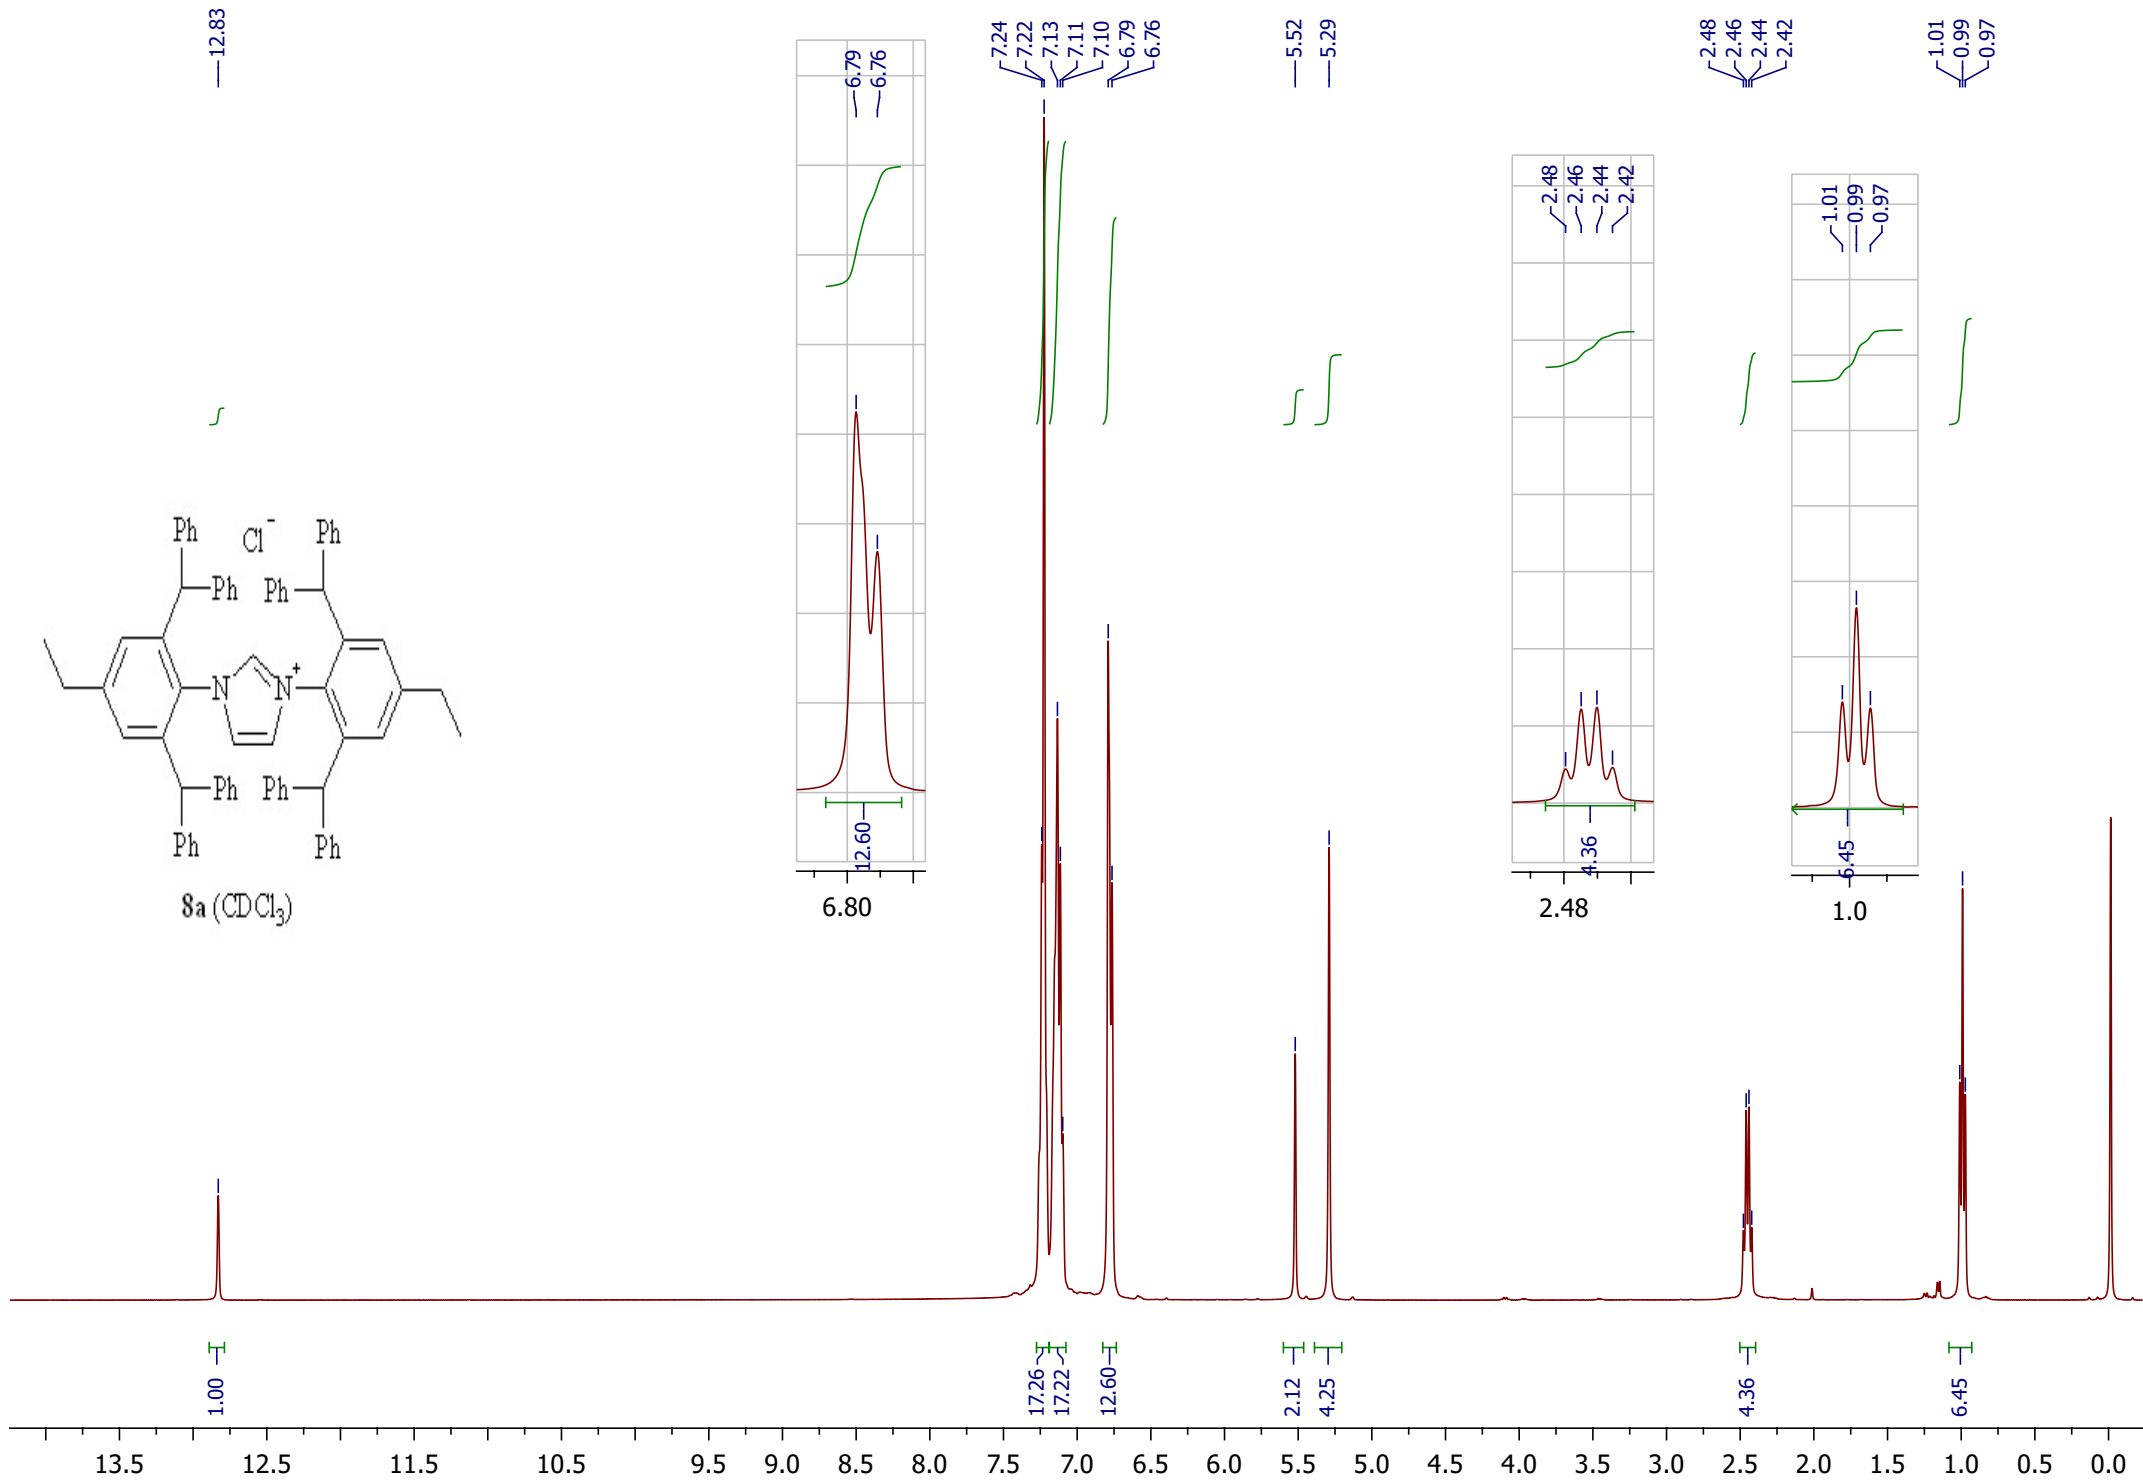

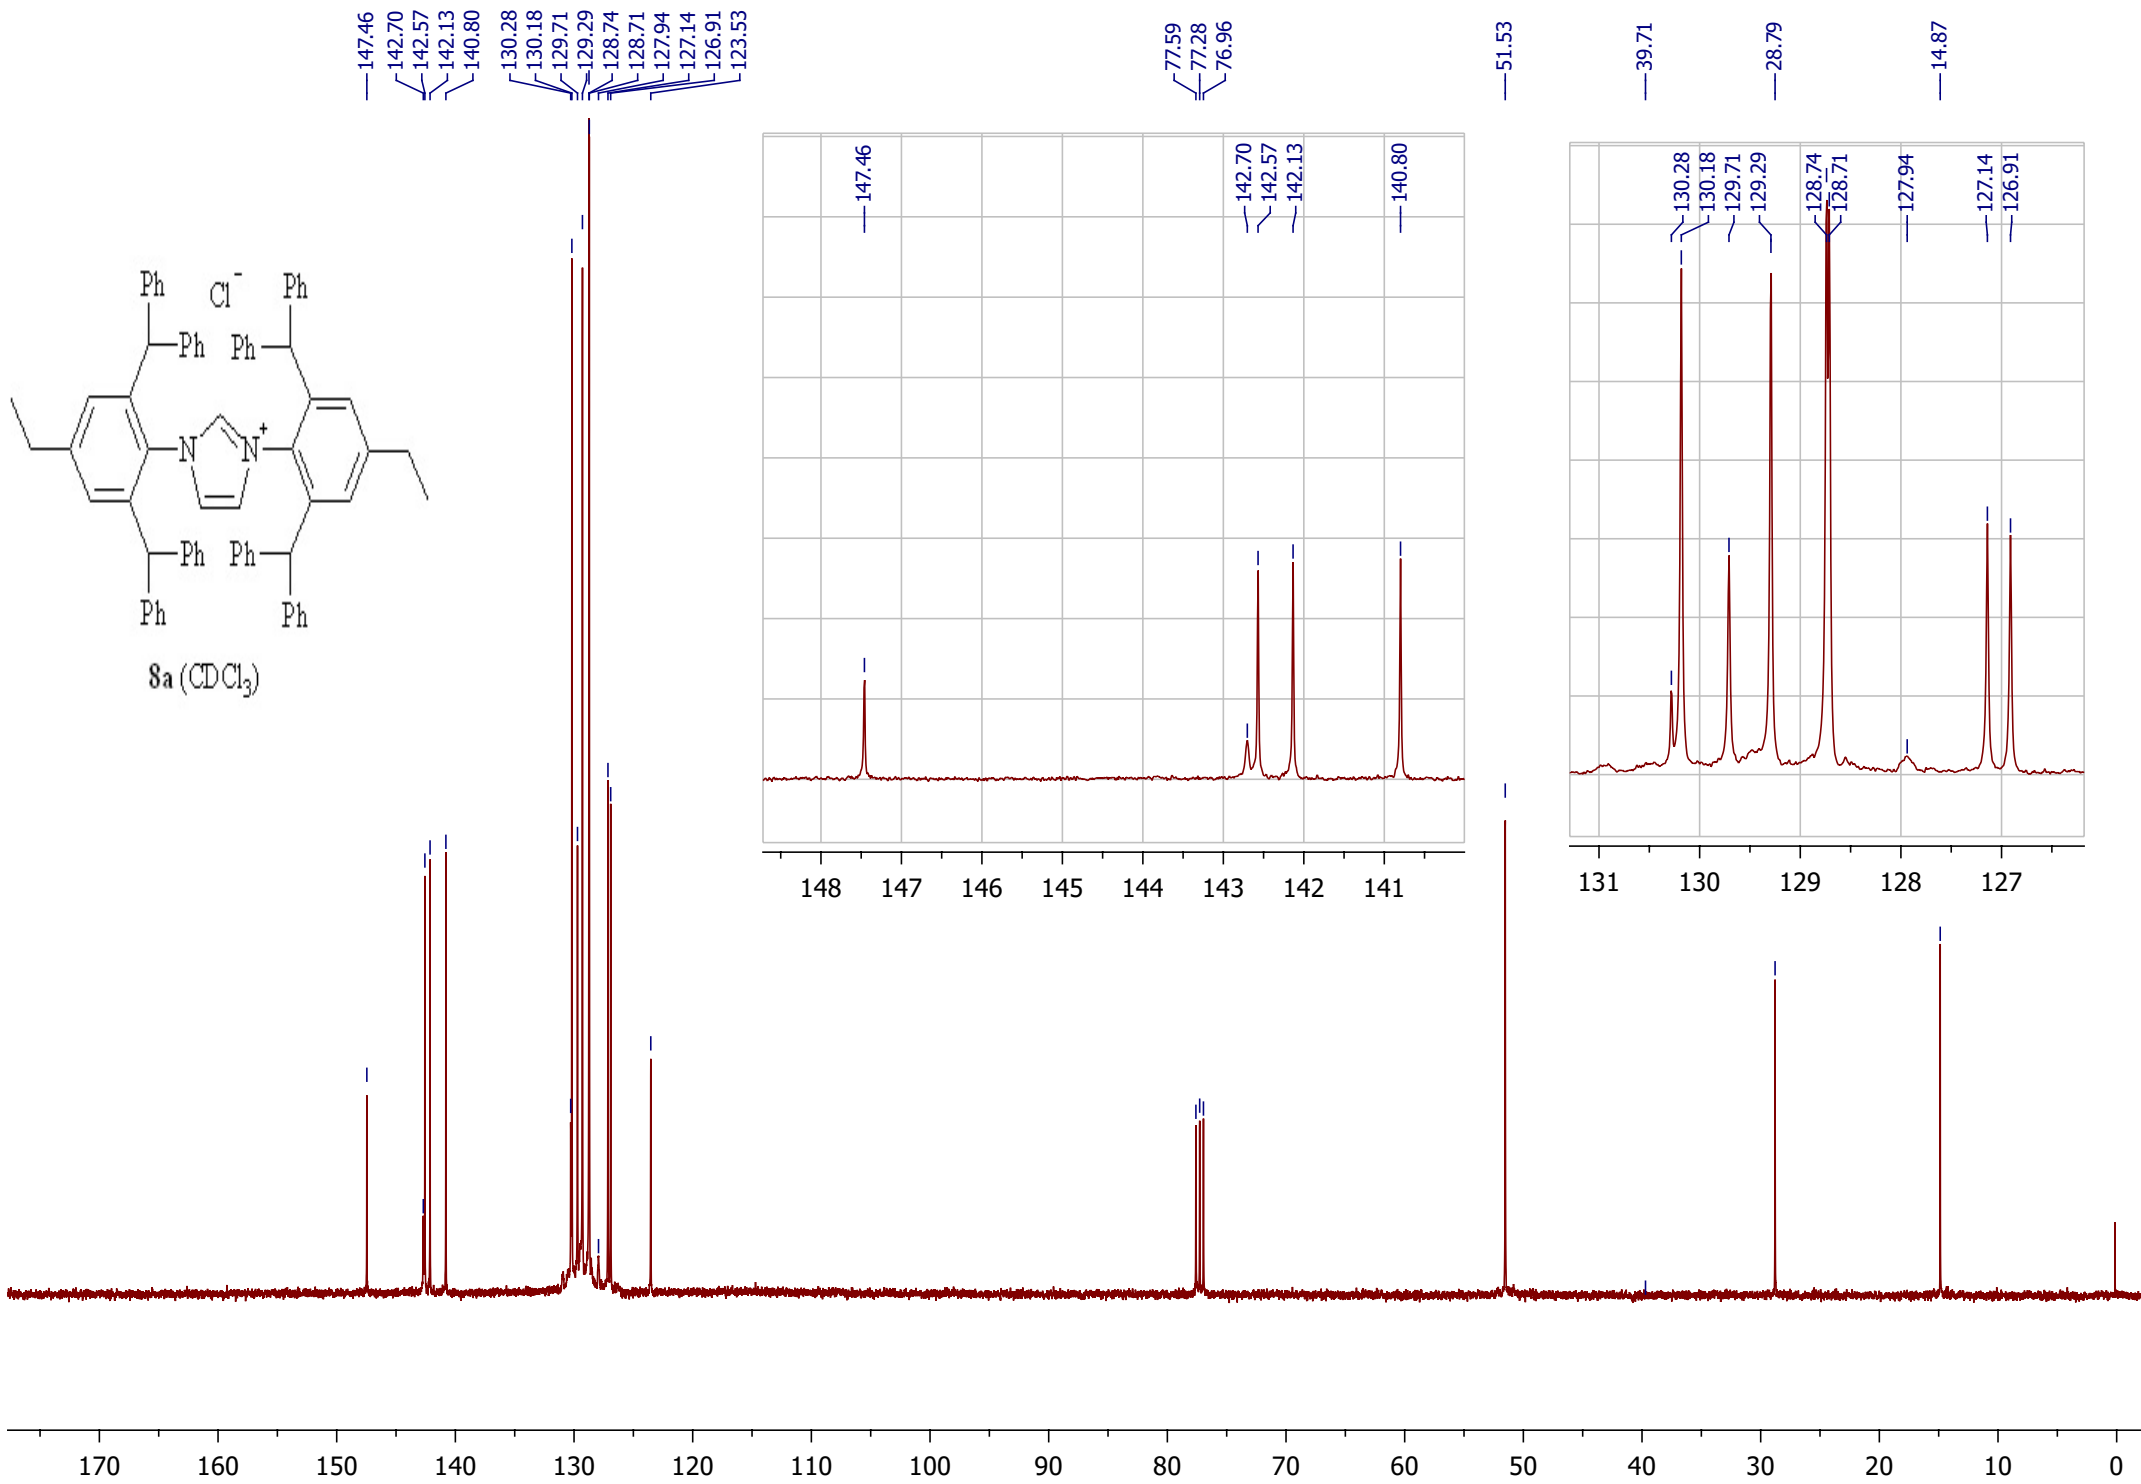

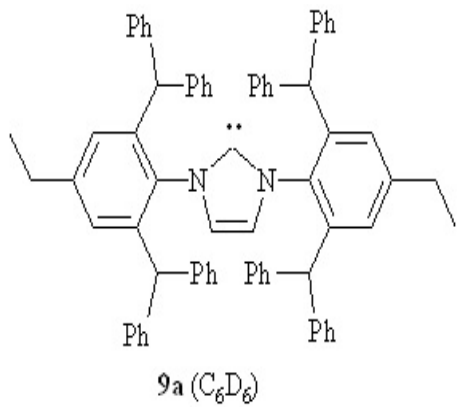

7.39  
7.38  
7.17  
7.11  
7.04  
6.99

6.04  
5.81

2.23  
2.21

1.42

0.87

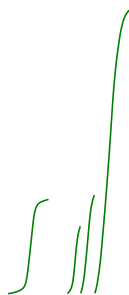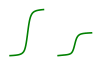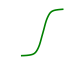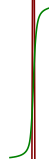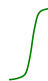

2.04  
1.46  
2.14  
6.15

1.00  
0.50

1.01

3.28

1.55

10.0 9.5 9.0 8.5 8.0 7.5 7.0 6.5 6.0 5.5 5.0 4.5 4.0 3.5 3.0 2.5 2.0 1.5 1.0 0.5 0.0

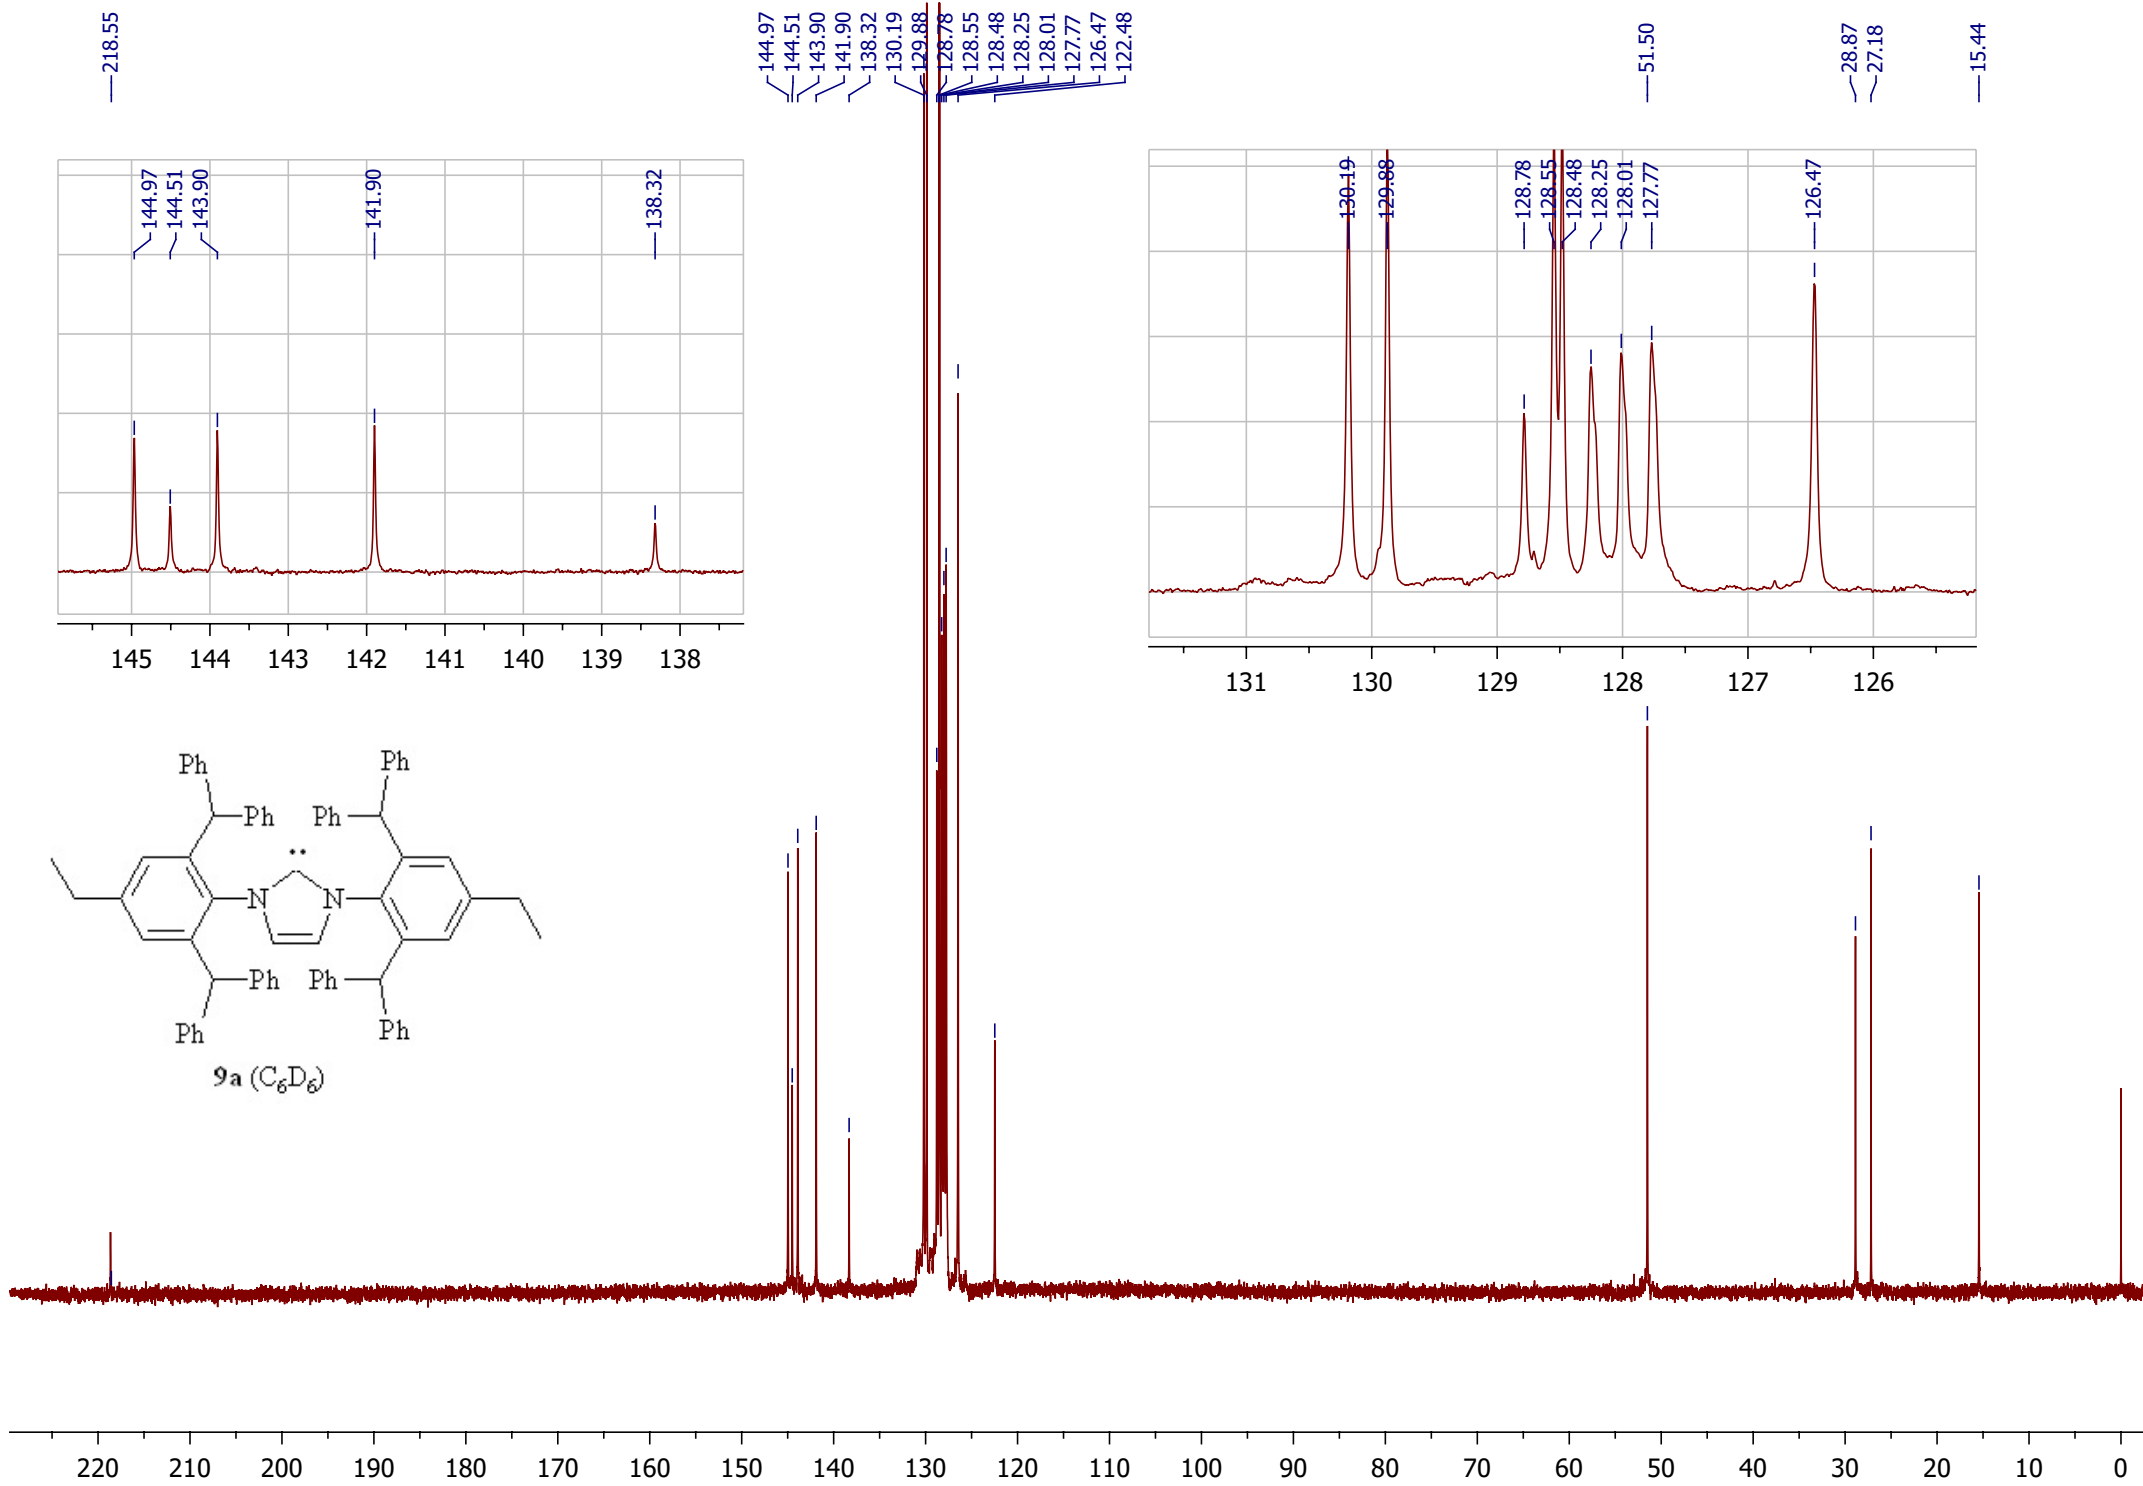

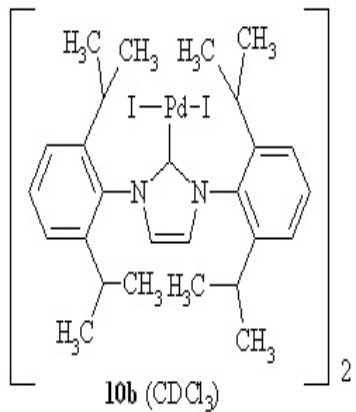

7.53  
7.51  
7.49  
7.34  
7.33  
7.26  
7.24  
7.09

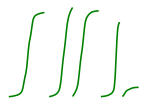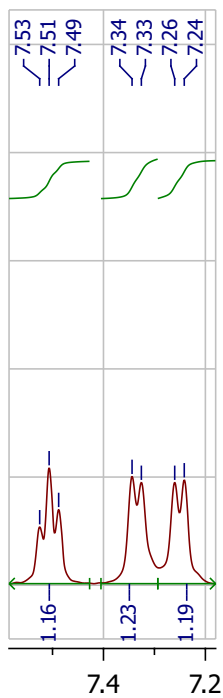

5.27

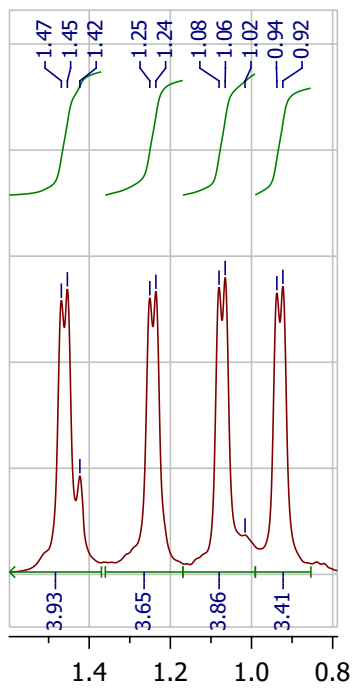

3.30  
3.29  
3.27

2.76  
2.75  
2.73

1.47  
1.45  
1.42  
1.25  
1.24  
1.08  
1.06  
1.02  
0.94  
0.92

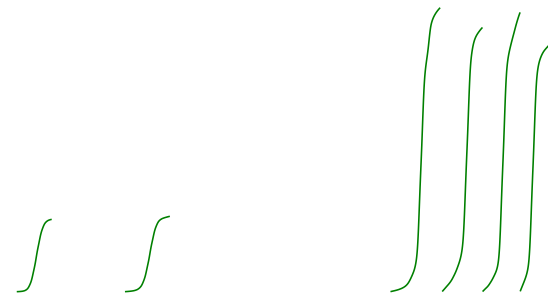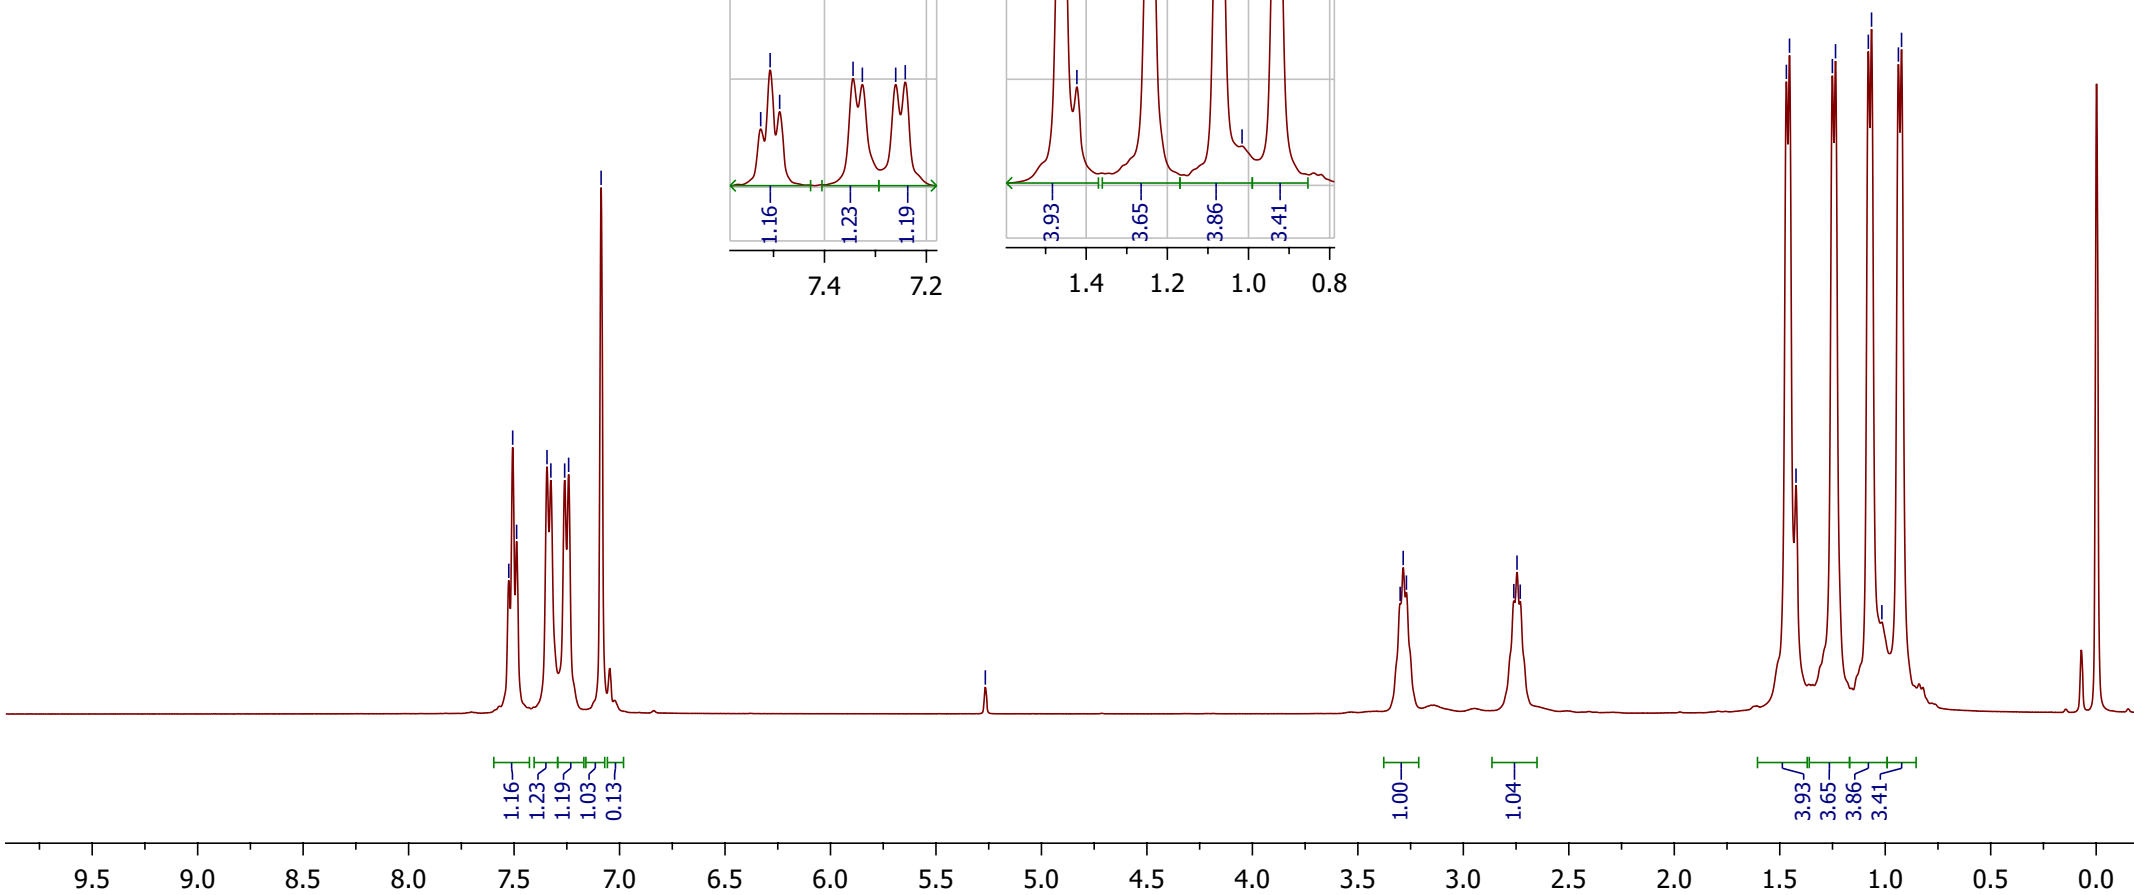

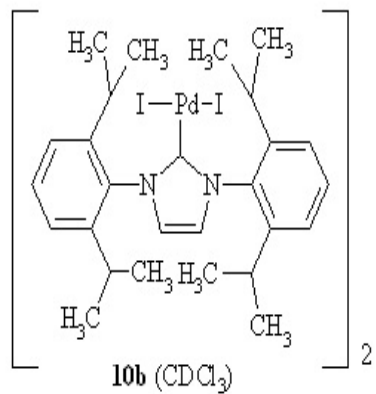

—165.44

146.33  
145.92

—135.34

—130.25

125.38

124.65

124.24

77.33  
77.01  
76.69

29.03

26.49

24.01

23.95

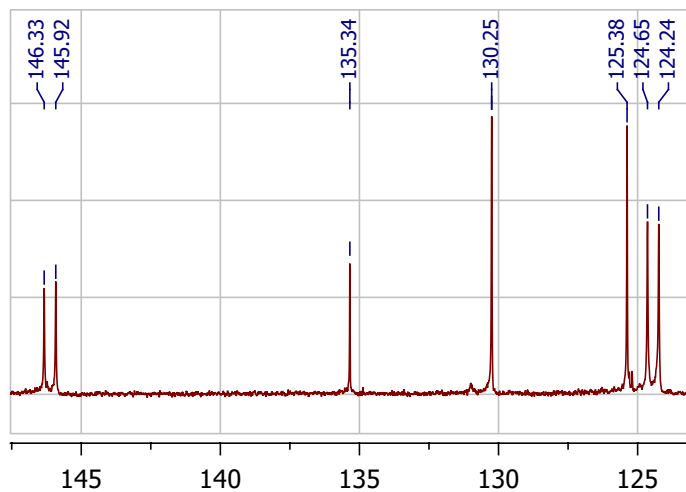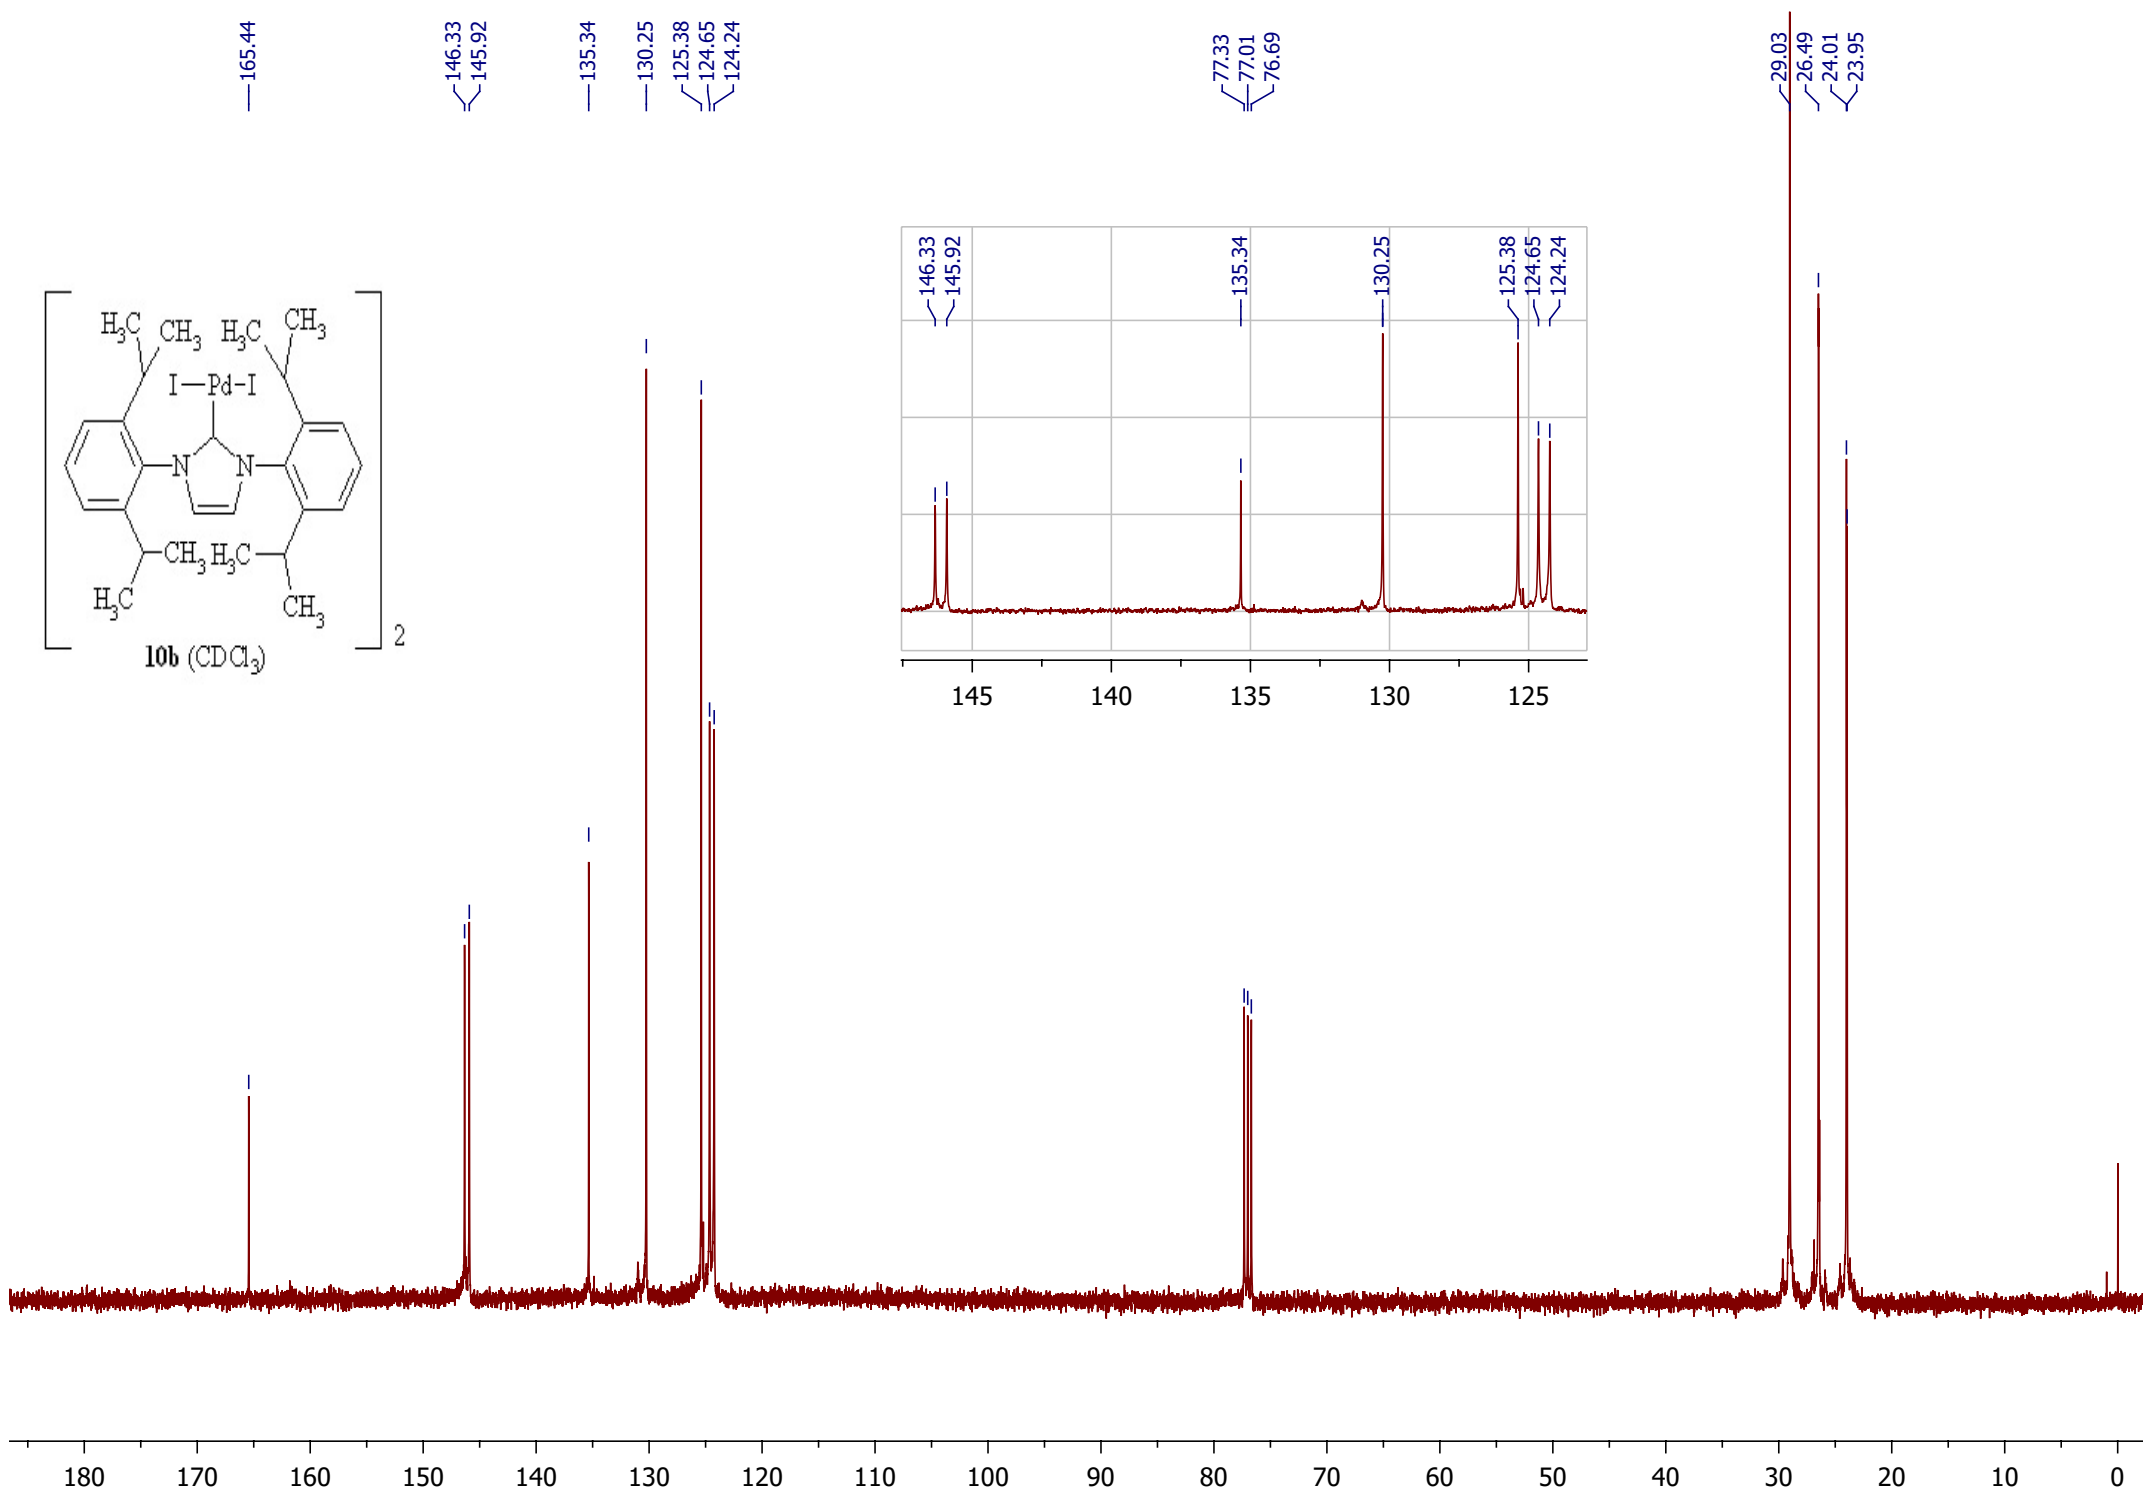

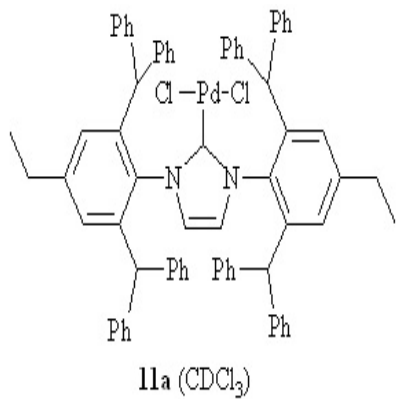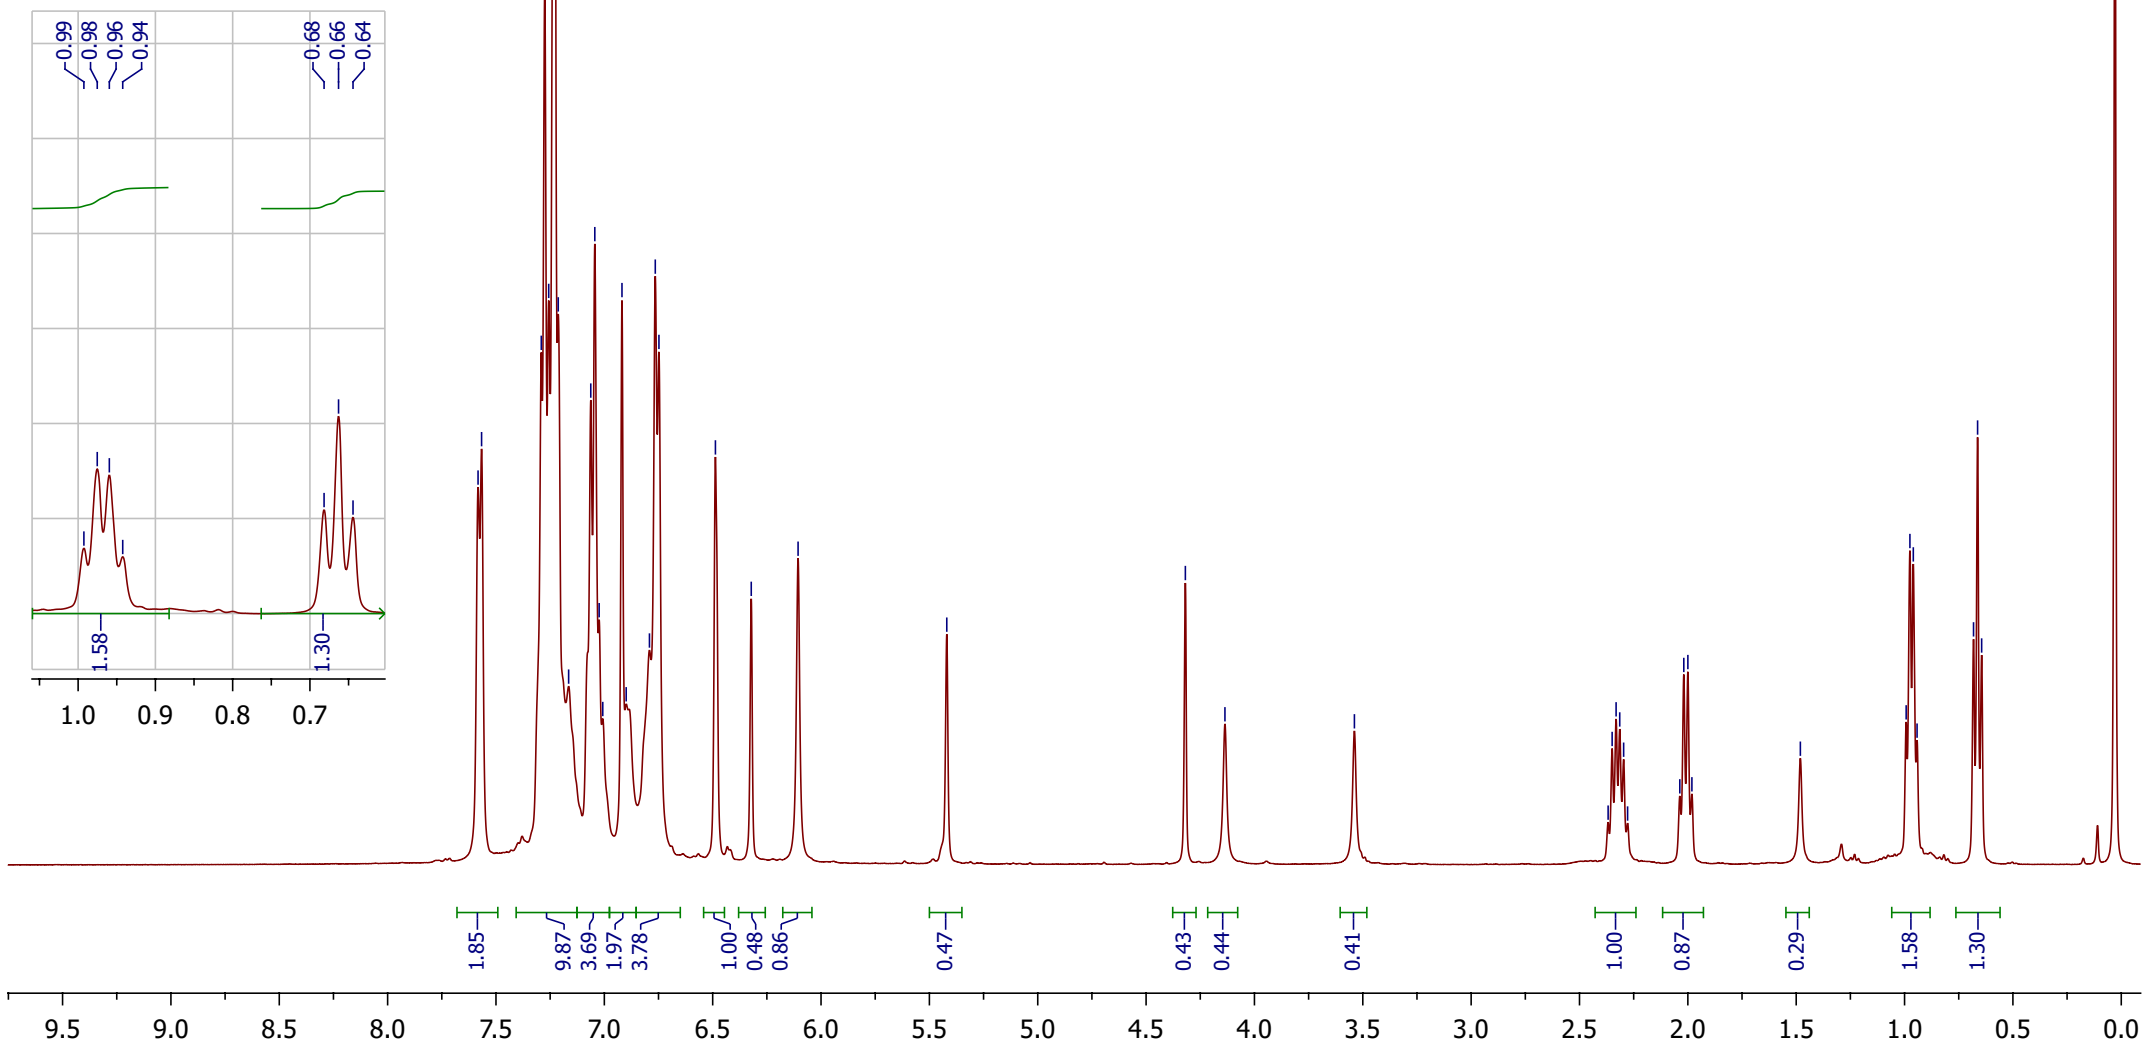



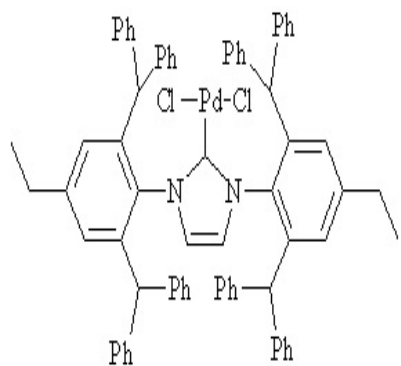

IIa (CDCl<sub>3</sub>)

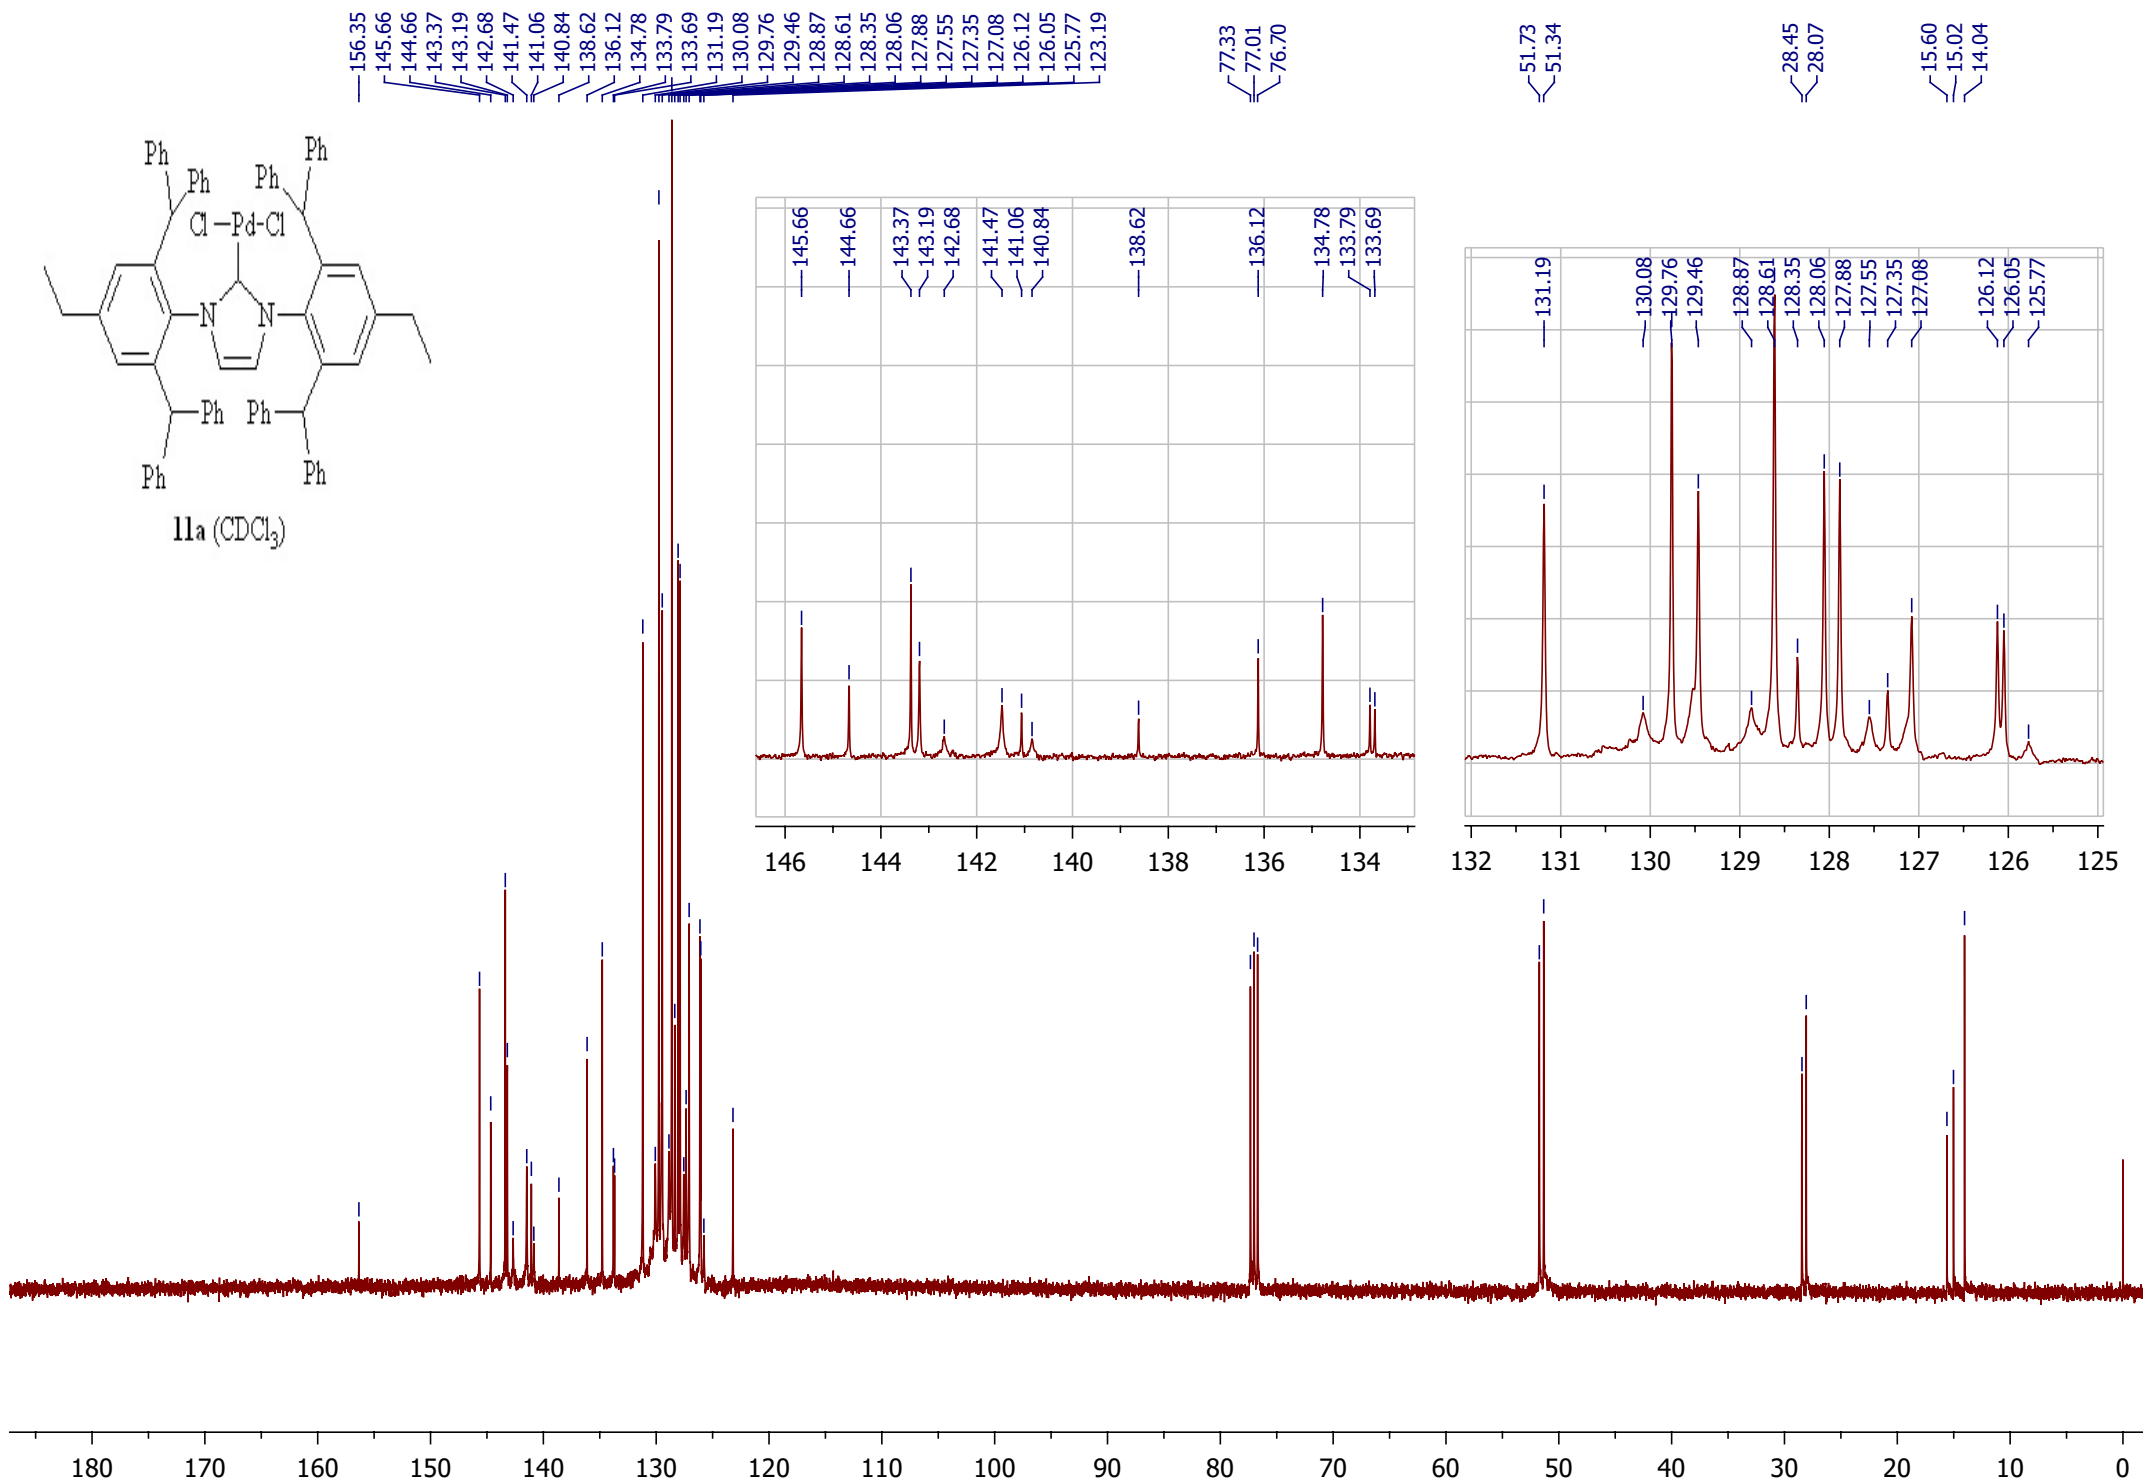

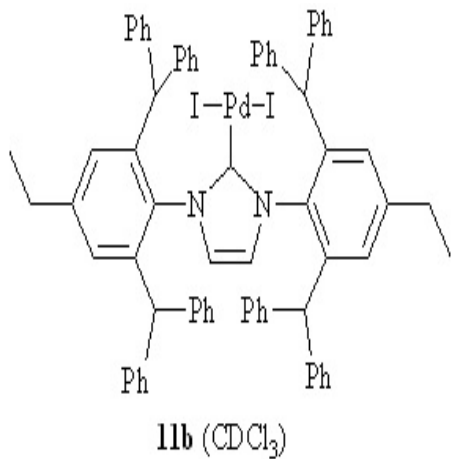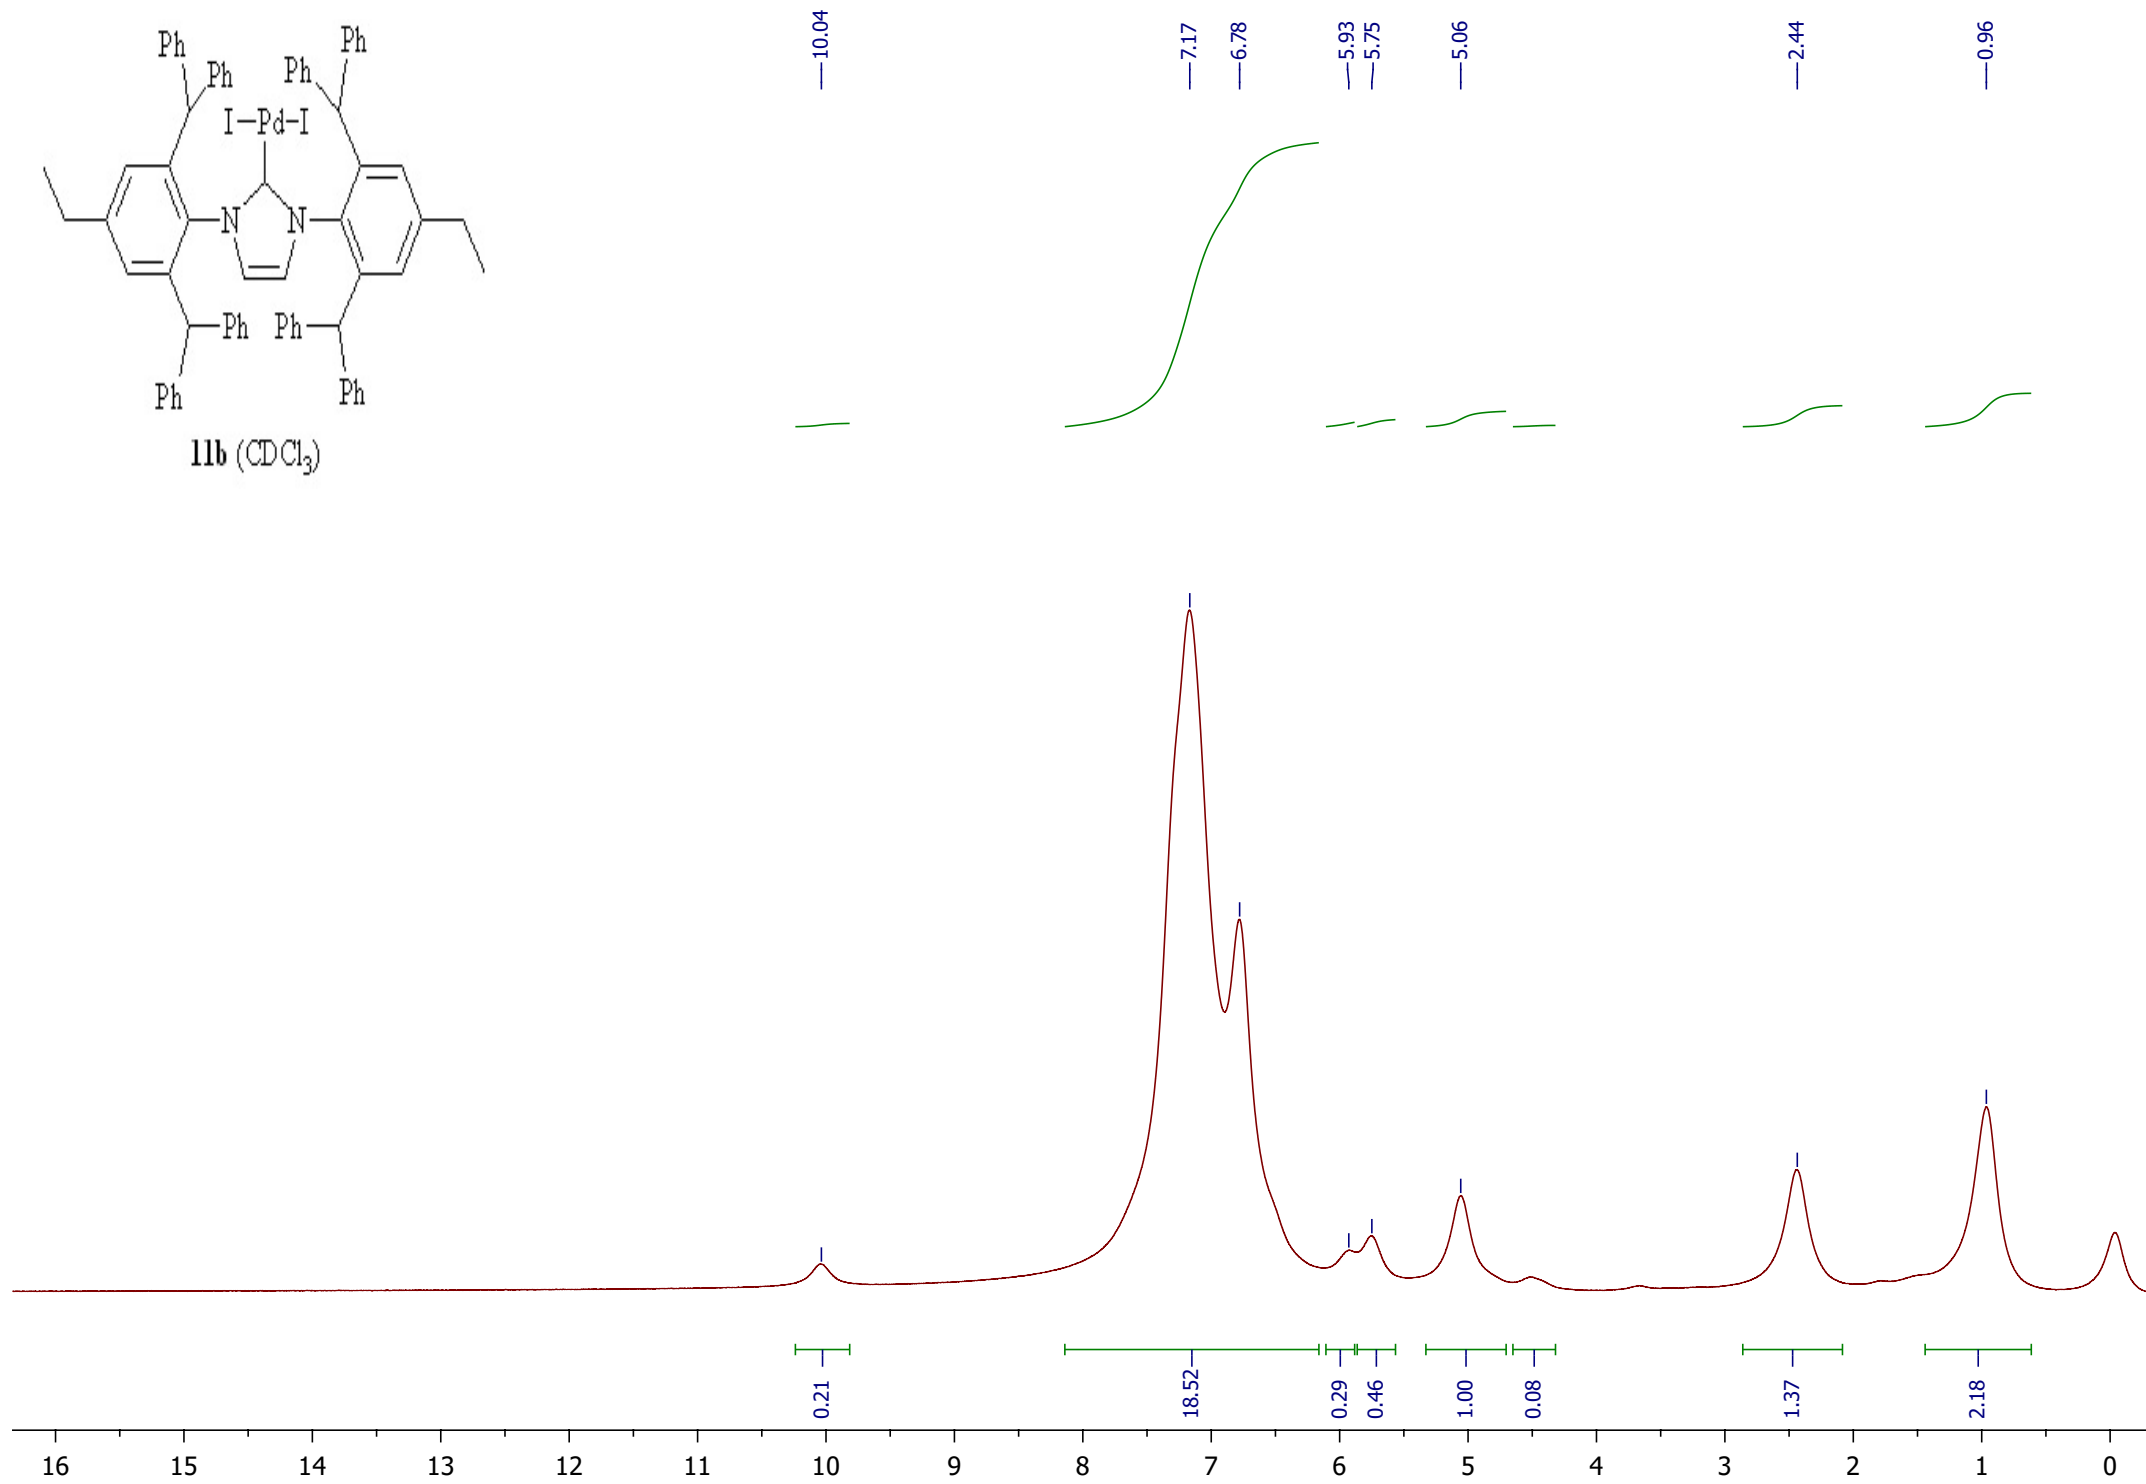

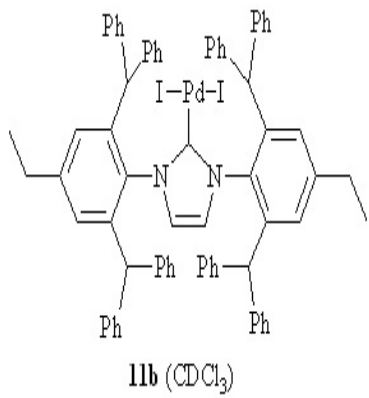

—155.44  
—149.09  
—143.07  
—142.23  
—141.39  
—138.19  
—131.97  
—130.85  
—129.99  
—129.25  
—128.57  
—128.30  
—125.43

—78.07

—52.61

—29.83

—16.06

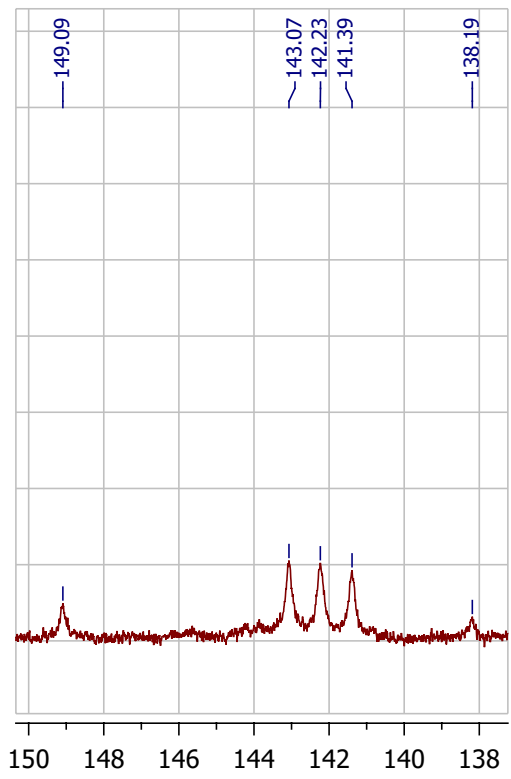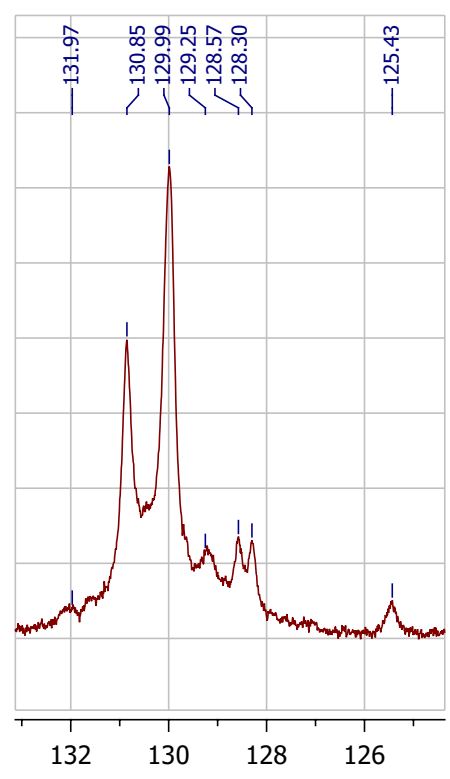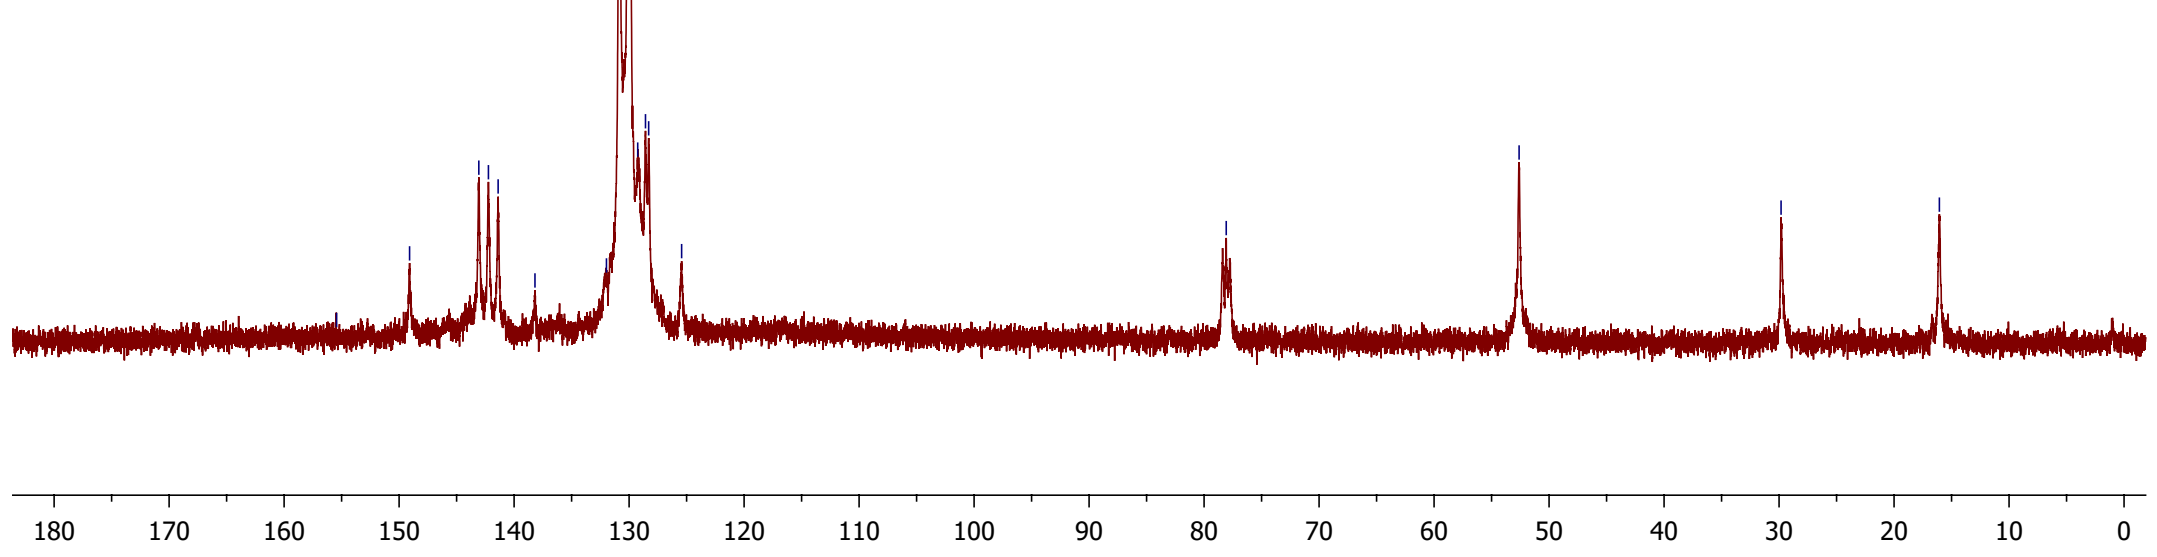

Supplement: c4dt02908a1.pdf [file c4dt02908a1.pdf]
